# Supplementary material
Source: publisher figshare collection journal article supplement (https://tandf.figshare.com/ndownloader/files/20178437)
Supplement: Supplementary file 1 [file 20178437]

Table S1. Primers used for amplification of various genes used in this study. Primer sequence portions underlined and in bold type for M13LF3 and M13Rx forward and reverse primers, respectively, refer to sequencing primers (M13F and M13R).

| Locus | Taxa | Primers | Primer sequence (5’-3’) | Reference/thermocycling regime |
| --- | --- | --- | --- | --- |
| COI-5P | Rhodophyta | M13LF3 | **TGTAAAACGACGGCCAGT**ACHAAYCAYAARGATATHGG | Saunders and Moore (2013) |
| M13Rx | **CAGGAAACAGCTATGAC**ACTTCTGGRTGICCRAARAAYCA |
| COI-5P | Phaeophyceae | GazF2 | CCAACCAYAAAGATATWGGTAC3 | Saunders and McDevit (2012) |
| GazR2 | GGATGACCAAARAACCAAAA |
| COI-5P | *Coccotylus* | GWSFn | TCAACAAAYCAYAAAGATATYGG3 | Saunders and Moore (2013) |
| GWSRx | ACTTCTGGRTGICCRAARAAYCA |  |
| COI-5P | *Chaetopteris* | SphCOIF1 | ATTTTTGGYGGTATYGCYGG | Saunders and Moore (2013) |
| SphCOIR1 | TGCTGRTAAAGMACAGGATC |
| *tufA* | Chlorophyta | TufGF4 | GGNGCNGCNCAAATGGAYGG | Saunders and Kucera (2010) |
| TufAR | CCTTCNCGAATMGCRAAWCGC |
| *rbc*L | Rhodophyta | F57 | GTAATTCCATATGCTAAAATGGG | Saunders and Moore (2013) |
| rbcLrevNEW | ACATTTGCTGTTGGAGTYTC |
| *rbc*L | Phaeophyceae | NDrbcL2 | AAAAGTGACCGTTATGAATC | Daugbjerg and Andersen (1997) |
| NDrbcL8 | CCAATAGTACCACCACCAAAT |  |

Table S2. Specimen list and GenBank accession numbers for marine macroalgal flora collected from the Bergen area, Norway, April 14-20 and July 3-13, 2016, including comparative records collected variously throughout the globe.

| Table 1 listing | GenBank listing | Voucher ID | COI-5P | *rbc*L | *tufA* | Sample Date | Locality | Lat. | Lon. |
| --- | --- | --- | --- | --- | --- | --- | --- | --- | --- |
| Chlorophyta |  |  |  |  |  |  |  |  |  |
| *Acrosiphonia arcta* | *Acrosiphonia arcta* | 2016_BIO309A_61 |  |  | MN184602 | 19-Apr-2016 | Norway | 60.114 | 5.067 |
| *Codium fragile* | *Codium fragile* | GWS020649 |  |  | MN184604 | 17-Jun-2010 | Canada, British Columbia | 54.033 | -132.053 |
| *Codium fragile* | *Codium fragile* | GWS014515 |  |  | MN184603 | 27-Aug-2010 | Ireland |  |  |
| *Codium fragile* | *Codium* sp. 1fragile | 2016_BIO309A_25 |  |  | MN184605 | 17-Apr-2016 | Norway | 60.27 | 5.221 |
| *Codium fragile* | *Codium* sp. 1fragile | GWS040883 |  |  | MN184607 | 12-Jun-2016 | Norway | 60.5308 | 4.98519 |
| *Codium fragile* | *Codium* sp. 1fragile | GWS038022 |  |  | MN184609 | 03-Jun-2016 | Norway | 60.2412 | 5.2021 |
| *Monostroma grevillei* | *Monostroma* sp. 1grevillei | GWS019886 |  |  | MN184610 | 12-Jun-2010 | Canada, British Columbia | 52.428 | -131.379 |
| *Monostroma grevillei* | *Monostroma* sp. 2grevillei | 2016_BIO309A_24 |  |  | MH308438 | 17-Apr-2016 | Norway | 60.27 | 5.221 |
| *Prasiola furfuracea* | *Prasiola furfuracea* | 2016_BIO309A_87 |  |  | MN184611 | 19-Apr-2016 | Norway | 60.114 | 5.067 |
| *Spongomorpha aeruginosa* | *Spongomorpha aeruginosa* | 2016_BIO309A_62 |  |  | MH308548 | 19-Apr-2016 | Norway | 60.114 | 5.067 |
| *Ulothrix flacca* | *Ulothrix flacca* | 2016_BIO309A_86 |  |  | MN184608 | 17-Apr-2016 | Norway | 60.27 | 5.221 |
| *Ulva fenestrata* | *Ulva fenestrata* | 2016_BIO309A_39 |  |  | MH308672 | 17-Apr-2016 | Norway | 60.27 | 5.221 |
| *Ulva intestinalis* | *Ulva intestinalis* | 2016_BIO309A_40 |  |  | MN184606 | 17-Apr-2016 | Norway | 60.27 | 5.221 |
| *Urospora* sp. | *Urospora* sp. 2Nome | GWS042597 |  |  | MH571157 | 22-Aug-2017 | United States, Alaska | 64.4985 | -165.424 |
| *Urospora* sp. | *Urospora* sp. 2Nome | 2016_BIO309A_74 |  |  | MN184601 | 19-Apr-2016 | Norway | 60.114 | 5.067 |
| Phaeophyceae |  |  |  |  |  |  |  |  |  |
| *Acrothrix gracilis* | *Acrothrix gracilis* | GWS040675 | MN184233 |  |  | 09-Jun-2016 | Norway | 60.1847 | 5.14938 |
| *Alaria esculenta* | *Alaria esculenta* | 2016_BIO309A_84 | KY572321 |  |  | 19-Apr-2016 | Norway | 60.114 | 5.067 |
| *Alaria esculenta* | *Alaria esculenta* | GWS040935 | KY572831 |  |  | 13-Jun-2016 | Norway | 60.159 | 5.00405 |
| *Alaria esculenta* | *Alaria esculenta* | GWS040934 | KY572415 |  |  | 13-Jun-2016 | Norway | 60.159 | 5.00405 |
| *Alaria esculenta* | *Alaria esculenta* | GWS040813 | KY572828 |  |  | 10-Jun-2016 | Norway | 60.1762 | 5.11132 |
| *Alaria esculenta* | *Alaria esculenta* | GWS040792 | KY572542 |  |  | 10-Jun-2016 | Norway | 60.1762 | 5.11132 |
| *Alaria esculenta* | *Alaria esculenta* | GWS040757 | KY572829 |  |  | 10-Jun-2016 | Norway | 60.1762 | 5.11132 |
| *Alaria esculenta* | *Alaria esculenta* | GWS040748 | KY572779 |  |  | 10-Jun-2016 | Norway | 60.1847 | 5.14938 |
| *Alaria esculenta* | *Alaria esculenta* | GWS040661 | KY572182 |  |  | 09-Jun-2016 | Norway | 60.1847 | 5.14938 |
| *Alaria esculenta* | *Alaria esculenta* | GWS040659 | KY572417 |  |  | 09-Jun-2016 | Norway | 60.1847 | 5.14938 |
| *Alaria esculenta* | *Alaria esculenta* | GWS039986 | KY572355 |  |  | 07-Jun-2016 | Norway | 60.6627 | 4.78749 |
| *Alaria esculenta* | *Alaria esculenta* | GWS039985 | KY572747 |  |  | 07-Jun-2016 | Norway | 60.6627 | 4.78749 |
| *Alaria esculenta* | *Alaria esculenta* | GWS039984 | KY572634 |  |  | 07-Jun-2016 | Norway | 60.6627 | 4.78749 |
| *Alaria esculenta* | *Alaria esculenta* | GWS039983 | KY572501 |  |  | 07-Jun-2016 | Norway | 60.6627 | 4.78749 |
| *Alaria esculenta* | *Alaria esculenta* | GWS039982 | KY572745 |  |  | 07-Jun-2016 | Norway | 60.6627 | 4.78749 |
| *Alaria esculenta* | *Alaria esculenta* | GWS039906 | KY572239 |  |  | 06-Jun-2016 | Norway | 60.4977 | 4.91225 |
| *Alaria esculenta* | *Alaria esculenta* | GWS039830 | KY572585 |  |  | 04-Jun-2016 | Norway | 60.4936 | 4.91898 |
| *Alaria esculenta* | *Alaria esculenta* | GWS039826 | KY572196 |  |  | 04-Jun-2016 | Norway | 60.4936 | 4.91898 |
| *Alaria esculenta* | *Alaria esculenta* | GWS039818 | KY572664 |  |  | 04-Jun-2016 | Norway | 60.4936 | 4.91898 |
| *Alaria esculenta* | *Alaria esculenta* | GWS039809 | KY572421 |  |  | 04-Jun-2016 | Norway | 60.4936 | 4.91898 |
| *Alaria esculenta* | *Alaria esculenta* | GWS038092 | KY572439 |  |  | 04-Jun-2016 | Norway | 60.4936 | 4.91898 |
| *Alaria esculenta* | *Alaria esculenta* | GWS036799 | KY572237 |  |  | 04-Jun-2016 | Norway | 60.4936 | 4.91898 |
| *Ascophyllum nodosum* | *Ascophyllum nodosum* | GWS038002 | MH309539 |  |  | 03-Jun-2016 | Norway | 60.2412 | 5.2021 |
| *Asperococcus bullosus* | *Asperococcus bullosus* | GWS040899 | MN184423 |  |  | 12-Jun-2016 | Norway | 60.5308 | 4.98519 |
| *Asperococcus bullosus* | *Asperococcus bullosus* | GWS040874 | MN184437 |  |  | 11-Jun-2016 | Norway | 60.4425 | 5.06462 |
| *Asperococcus bullosus* | *Asperococcus bullosus* | GWS040825 |  | MN184561 |  | 11-Jun-2016 | Norway | 60.4425 | 5.06462 |
| *Asperococcus bullosus* | *Asperococcus bullosus* | GWS040819 | MN184505 |  |  | 11-Jun-2016 | Norway | 60.4425 | 5.06462 |
| *Asperococcus bullosus* | *Asperococcus bullosus* | GWS040059 |  | MN184531 |  | 08-Jun-2016 | Norway | 60.6627 | 4.78749 |
| *Asperococcus bullosus* | *Asperococcus bullosus* | GWS025225 |  | MN510448 |  | 12-Nov-2010 | Australia | -33.562 | 115.074 |
| *Asperococcus fistulosus* | *Asperococcus fistulosus* | GWS040906 |  | MN184536 |  | 12-Jun-2016 | Norway | 60.5308 | 4.98519 |
| *Asperococcus fistulosus* | *Asperococcus fistulosus* | GWS039838 |  | MN184559 |  | 04-Jun-2016 | Norway | 60.4936 | 4.91898 |
| *Asperococcus fistulosus* | *Asperococcus fistulosus* | GWS038020 |  | MN184557 |  | 03-Jun-2016 | Norway | 60.2412 | 5.2021 |
| *Chaetopteris plumosa* | *Chaetopteris plumosa* | GWS040998 | MH309225 | MH277208 |  | 13-Jun-2016 | Norway | 60.159 | 5.23564 |
| *Chaetopteris plumosa* | *Chaetopteris plumosa* | GWS040917 |  | MN184544 |  | 12-Jun-2016 | Norway | 60.5308 | 4.98519 |
| *Chaetopteris plumosa* | *Chaetopteris plumosa* | GWS040871 | MH309601 | MH277241 |  | 11-Jun-2016 | Norway | 60.4425 | 5.06462 |
| *Chaetopteris plumosa* | *Chaetopteris plumosa* | GWS040794 | MH309213 | MH277207 |  | 10-Jun-2016 | Norway | 60.1762 | 5.11132 |
| *Chaetopteris plumosa* | *Chaetopteris plumosa* | GWS040751 | MH309375 | MH277225 |  | 10-Jun-2016 | Norway | 60.1762 | 5.11132 |
| *Chaetopteris plumosa* | *Chaetopteris plumosa* | GWS040624 | MH308864 | MH277185 |  | 09-Jun-2016 | Norway | 60.1847 | 5.14938 |
| *Chaetopteris plumosa* | *Chaetopteris plumosa* | GWS040612 | MH309543 | MH277236 |  | 09-Jun-2016 | Norway | 60.1847 | 5.14938 |
| *Chorda filum* | *Chorda filum* | GWS040919 | MN184260 |  |  | 12-Jun-2016 | Norway | 60.5308 | 4.98519 |
| *Chorda filum* | *Chorda filum* | GWS039896 | MN184350 |  |  | 05-Jun-2016 | Norway | 60.4977 | 4.91225 |
| *Chorda filum* | *Chorda filum* | GWS039874 | MN184385 |  |  | 05-Jun-2016 | Norway | 60.6627 | 4.78749 |
| *Chorda filum* | *Chorda filum* | GWS039841 | MN184446 |  |  | 04-Jun-2016 | Norway | 60.4936 | 4.91898 |
| *Chorda filum* | *Chorda filum* | GWS038013 | MN184447 |  |  | 03-Jun-2016 | Norway | 60.2412 | 5.2021 |
| *Chorda filum* | *Chorda filum* | GWS040994 | MN184379 |  |  | 13-Jun-2016 | Norway | 60.159 | 5.23564 |
| *Chorda filum* | *Chorda filum* | GWS040876 | MN184229 |  |  | 11-Jun-2016 | Norway | 60.4425 | 5.06462 |
| *Chordaria flagelliformis* | *Chordaria flagelliformis* | GWS040902 | MH308757 |  |  | 12-Jun-2016 | Norway | 60.5308 | 4.98519 |
| *Chordaria flagelliformis* | *Chordaria flagelliformis* | GWS040909 | MH309452 |  |  | 12-Jun-2016 | Norway | 60.5308 | 4.98519 |
| *Chordaria flagelliformis* | *Chordaria flagelliformis* | GWS040908 | MH308790 |  |  | 12-Jun-2016 | Norway | 60.5308 | 4.98519 |
| *Cladostephus spongiosum* | *Cladostephus spongiosus* | 2016_BIO309A_76 |  | MN184556 |  | 19-Apr-2016 | Norway | 60.114 | 5.067 |
| *Cladostephus spongiosum* | *Cladostephus spongiosus* | GWS039868 |  | MN184568 |  | 05-Jun-2016 | Norway | 60.6627 | 4.78749 |
| *Cutlera multifida* | *Cutleria multifida* | GWS040818 | MN184332 |  |  | 11-Jun-2016 | Norway | 60.4425 | 5.06462 |
| *Desmarestia aculeata* | *Desmarestia* sp. 1aculeata | 2016_BIO309A_14 | MH309090 |  |  | 14-Apr-2016 | Norway | 60.242 | 5.24 |
| *Desmarestia aculeata* | *Desmarestia* sp. 1aculeata | GWS040898 | MH309022 |  |  | 12-Jun-2016 | Norway | 60.5308 | 4.98519 |
| *Desmarestia aculeata* | *Desmarestia* sp. 1aculeata | GWS040801 | MH309810 |  |  | 10-Jun-2016 | Norway | 60.1762 | 5.11132 |
| *Desmarestia aculeata* | *Desmarestia* sp. 1aculeata | GWS040776 | MH309302 |  |  | 10-Jun-2016 | Norway | 60.1762 | 5.11132 |
| *Desmarestia aculeata* | *Desmarestia* sp. 1aculeata | GWS040762 | MH309783 |  |  | 10-Jun-2016 | Norway | 60.1762 | 5.11132 |
| *Desmarestia aculeata* | *Desmarestia* sp. 1aculeata | GWS040669 | MH309711 |  |  | 09-Jun-2016 | Norway | 60.1847 | 5.14938 |
| *Desmarestia aculeata* | *Desmarestia* sp. 1aculeata | GWS040090 | MH309662 |  |  | 08-Jun-2016 | Norway | 60.6627 | 4.78749 |
| *Desmarestia aculeata* | *Desmarestia* sp. 1aculeata | GWS040044 | MH308761 |  |  | 07-Jun-2016 | Norway | 60.6627 | 4.78749 |
| *Desmarestia aculeata* | *Desmarestia* sp. 1aculeata | GWS034985 | MH308771 |  |  | 04-Jun-2016 | Norway | 60.4936 | 4.91898 |
| *Desmarestia aculeata* | *Desmarestia* sp. 2aculeata | GWS042448 | MH593062 |  |  | 20-Aug-2017 | United States, Alaska | 64.4724 | -166.212 |
| *Desmarestia aculeata* | *Desmarestia* sp. 2aculeata | GWS003121 | MH593056 |  |  | 13-Sep-2005 | Canada, British Columbia | 48.835 | -125.146 |
| *Dictyota dichotoma* | *Dictyota dichotoma* | GWS040987 | MN184254 |  |  | 13-Jun-2016 | Norway | 60.159 | 5.23564 |
| *Dictyota dichotoma* | *Dictyota dichotoma* | GWS040969 | MN184493 |  |  | 13-Jun-2016 | Norway | 60.159 | 5.23564 |
| *Dictyota dichotoma* | *Dictyota dichotoma* | GWS040011 | MN184339 |  |  | 07-Jun-2016 | Norway | 60.6627 | 4.78749 |
| *Dictyota dichotoma* | *Dictyota dichotoma* | GWS039980 | MN184251 |  |  | 06-Jun-2016 | Norway | 60.4936 | 4.91898 |
| *Dictyota dichotoma* | *Dictyota dichotoma* | GWS040060 | MN184242 |  |  | 08-Jun-2016 | Norway | 60.6627 | 4.78749 |
| *Ectocarpus fasciculatus* | *Ectocarpus fasciculatus* | GWS040807 | KY572230 |  |  | 10-Jun-2016 | Norway | 60.1762 | 5.11132 |
| *Ectocarpus fasciculatus* | *Ectocarpus fasciculatus* | GWS040926 | KY572672 |  |  | 12-Jun-2016 | Norway | 60.5308 | 4.98519 |
| *Ectocarpus fasciculatus* | *Ectocarpus fasciculatus* | GWS040912 | KY572448 |  |  | 12-Jun-2016 | Norway | 60.5308 | 4.98519 |
| *Ectocarpus fasciculatus* | *Ectocarpus fasciculatus* | GWS040903 | KY572614 |  |  | 12-Jun-2016 | Norway | 60.5308 | 4.98519 |
| *Ectocarpus fasciculatus* | *Ectocarpus fasciculatus* | GWS040809 | KY572372 |  |  | 10-Jun-2016 | Norway | 60.1762 | 5.11132 |
| *Ectocarpus fasciculatus* | *Ectocarpus fasciculatus* | GWS040091 | KY572373 |  |  | 08-Jun-2016 | Norway | 60.6627 | 4.78749 |
| *Ectocarpus siliculosus* | *Ectocarpus siliculosus* | GWS004332 | MN184430 |  |  | 24-Jun-2006 | Canada, British Columbia | 48.852 | -125.122 |
| *Ectocarpus siliculosus* | *Ectocarpus siliculosus* | GWS006246 | HM891327 |  |  | 27-Aug-2007 | Canada, New Brunswick | 46.829 | -64.906 |
| *Ectocarpus siliculosus* | *Ectocarpus siliculosus* | GWS040904 | MN184426 |  |  | 12-Jun-2016 | Norway | 60.5308 | 4.98519 |
| *Ectocarpus siliculosus* | *Ectocarpus* sp. 1siliculosus | GWS007371 | MN184295 |  |  | 17-Jul-2006 | Canada, Newfoundland and Labrador | 49.114 | -58.414 |
| *Ectocarpus siliculosus* | *Ectocarpus* sp. 2siliculosus | GWS003209A | MN184275 |  |  | 15-Sep-2005 | Canada, British Columbia | 48.772 | -125.158 |
| *Ectocarpus* sp. | *Ectocarpus* sp. 4GWS | GWS040821 | MN184389 |  |  | 11-Jun-2016 | Norway | 60.4425 | 5.06462 |
| *Elachista fucicola* | *Elachista fucicola* | GWS039832 | MN184252 |  |  | 04-Jun-2016 | Norway | 60.4936 | 4.91898 |
| *Elachista fucicola* | *Elachista* sp. 1fucicola | GWS020604 | HQ990654 | MN184565 |  | 16-Jun-2010 | Canada, British Columbia | 52.762 | -131.612 |
| *Eudesme borealis* | *Eudesme borealis* | GWS038051 | MH310006 |  |  | 03-Jun-2016 | Norway | 60.2412 | 5.2021 |
| *Eudesme borealis* | *Eudesme borealis* | GWS038040 | MH309462 |  |  | 03-Jun-2016 | Norway | 60.2412 | 5.2021 |
| *Fucus distichus* | *Fucus distichus* | 2016_BIO309A_56 | MH308941 |  |  | 19-Apr-2016 | Norway | 60.114 | 5.067 |
| *Fucus serratus* | *Fucus serratus* | 2016_BIO309A_35 | MN184386 |  |  | 17-Apr-2016 | Norway | 60.27 | 5.221 |
| *Fucus serratus* | *Fucus serratus* | GWS038025 | MN184256 |  |  | 03-Jun-2016 | Norway | 60.2412 | 5.2021 |
| *Fucus spiralis* | *Fucus spiralis* | GWS039866 | MN184397 |  |  | 05-Jun-2016 | Norway | 60.6627 | 4.78749 |
| *Fucus spiralis* | *Fucus spiralis* | GWS038000 | MN184268 |  |  | 03-Jun-2016 | Norway | 60.2412 | 5.2021 |
| *Fucus vesiculosis* | *Fucus vesiculosus* | 2016_BIO309A_42 | MN184303 |  |  | 17-Apr-2016 | Norway | 60.27 | 5.221 |
| *Fucus vesiculosis* | *Fucus vesiculosus* | GWS038071 | MN184434 |  |  | 03-Jun-2016 | Norway | 60.2692 | 5.22123 |
| *Halidrys siliquosa* | *Halidrys siliquosa* | 2016_BIO309A_53 | MN184471 |  |  | 19-Apr-2016 | Norway | 60.114 | 5.067 |
| *Halidrys siliquosa* | *Halidrys siliquosa* | GWS040743 | MN184298 |  |  | 10-Jun-2016 | Norway | 60.1847 | 5.14938 |
| *Halidrys siliquosa* | *Halidrys siliquosa* | GWS040037 | MN184395 |  |  | 07-Jun-2016 | Norway | 60.6627 | 4.78749 |
| *Halidrys siliquosa* | *Halidrys siliquosa* | GWS038026 | MN184344 |  |  | 03-Jun-2016 | Norway | 60.2412 | 5.2021 |
| *Halosiphon tomentosus* | *Halosiphon* sp. 2tomentosus | GWS005334 | JX571976 |  |  | 22-Aug-2006 | Canada, Manitoba | 58.781 | -94.277 |
| *Halosiphon tomentosus* | *Halosiphon tomentosus* | 2016_BIO309A_50 | MN184301 |  |  | 19-Apr-2016 | Norway | 60.114 | 5.067 |
| *Haplospora globosa* | *Haplospora globosa* | 2016_BIO309A_10 | MH308922 |  |  | 14-Apr-2016 | Norway | 60.242 | 5.24 |
| *Himanthalia elongata* | *Himanthalia elongata* | 2016_BIO309A_51 | MN184459 |  |  | 19-Apr-2016 | Norway | 60.114 | 5.067 |
| *Himanthalia elongata* | *Himanthalia elongata* | GWS039908 | MN184240 |  |  | 06-Jun-2016 | Norway | 60.4977 | 4.91225 |
| *Hincksia hincksiae* | *Hincksia hincksiae* | GWS040954 | MN184281 |  |  | 13-Jun-2016 | Norway | 60.159 | 5.00405 |
| *Isthmoplea sphaerophora* | *Isthmoplea sphaerophora* | 2016_BIO309A_31 |  | MN184550 |  | 17-Apr-2016 | Norway | 60.27 | 5.221 |
| *Laminaria digitata* | *Laminaria digitata* | 2016_BIO309A_83 | KY572365 |  |  | 19-Apr-2016 | Norway | 60.114 | 5.067 |
| *Laminaria digitata* | *Laminaria digitata* | GWS039871 | KY572469 |  |  | 05-Jun-2016 | Norway | 60.6627 | 4.78749 |
| *Laminaria digitata* | *Laminaria digitata* | GWS036798 | KY572474 |  |  | 04-Jun-2016 | Norway | 60.4936 | 4.91898 |
| *Laminaria digitata* | *Laminaria digitata* | GWS040749 | KY572451 |  |  | 10-Jun-2016 | Norway | 60.1847 | 5.14938 |
| *Laminaria digitata* | *Laminaria digitata* | GWS039808 | KY572703 |  |  | 04-Jun-2016 | Norway | 60.4936 | 4.91898 |
| *Laminaria digitata* | *Laminaria digitata* | GWS038091 | KY572591 |  |  | 04-Jun-2016 | Norway | 60.4936 | 4.91898 |
| *Laminaria hyperborea* | *Laminaria hyperborea* | GWS040932 | MN184373 |  |  | 12-Jun-2016 | Norway | 60.5308 | 4.98519 |
| *Laminaria hyperborea* | *Laminaria hyperborea* | GWS038080 | MN184473 |  |  | 03-Jun-2016 | Norway | 60.2692 | 5.22123 |
| *Laminaria hyperborea* | *Laminaria hyperborea* | GWS038036 | MN184267 |  |  | 03-Jun-2016 | Norway | 60.2412 | 5.2021 |
| *Laminaria hyperborea* | *Laminaria hyperborea* | GWS038027 | MN184480 |  |  | 03-Jun-2016 | Norway | 60.2412 | 5.2021 |
| *Laminaria hyperborea* | *Laminaria hyperborea* | GWS040850 | MN184458 |  |  | 11-Jun-2016 | Norway | 60.4425 | 5.06462 |
| *Laminaria hyperborea* | *Laminaria hyperborea* | GWS039937 | MN184392 |  |  | 06-Jun-2016 | Norway | 60.4977 | 4.91225 |
| *Laminaria hyperborea* | *Laminaria hyperborea* | GWS040925 | MN184271 |  |  | 12-Jun-2016 | Norway | 60.5308 | 4.98519 |
| *Laminaria hyperborea* | *Laminaria hyperborea* | GWS039991 | MN184470 |  |  | 07-Jun-2016 | Norway | 60.6627 | 4.78749 |
| *Laminaria hyperborea* | *Laminaria hyperborea* | GWS039990 | MN184317 |  |  | 07-Jun-2016 | Norway | 60.6627 | 4.78749 |
| *Laminaria hyperborea* | *Laminaria hyperborea* | GWS039989 | MN184402 |  |  | 07-Jun-2016 | Norway | 60.6627 | 4.78749 |
| *Laminaria hyperborea* | *Laminaria hyperborea* | GWS039988 | MN184441 |  |  | 07-Jun-2016 | Norway | 60.6627 | 4.78749 |
| *Laminaria hyperborea* | *Laminaria hyperborea* | GWS039987 | MN184376 |  |  | 07-Jun-2016 | Norway | 60.6627 | 4.78749 |
| *Laminaria hyperborea* | *Laminaria hyperborea* | GWS039904 | MN184230 |  |  | 06-Jun-2016 | Norway | 60.4977 | 4.91225 |
| *Laminaria hyperborea* | *Laminaria hyperborea* | GWS040658 | MN184429 |  |  | 09-Jun-2016 | Norway | 60.1847 | 5.14938 |
| *Laminaria hyperborea* | *Laminaria hyperborea* | GWS039828 | MN184374 |  |  | 04-Jun-2016 | Norway | 60.4936 | 4.91898 |
| *Leathesia marina* | *Leathesia marina* | GWS039816 | MN184509 |  |  | 04-Jun-2016 | Norway | 60.4936 | 4.91898 |
| *Leathesia marina* | *Leathesia marina* | GWS038031 | MN184285 |  |  | 03-Jun-2016 | Norway | 60.2412 | 5.2021 |
| *Lithoderma* sp. | *Lithoderma* sp. 1GWS | GWS012497 | HQ990694 | MN184532 |  | 23-Aug-2010 | Canada, New Brunswick | 45.162 | -67.045 |
| *Lithoderma* sp. | *Lithoderma* sp. 1GWS | GWS040916 | MN184322 |  |  | 12-Jun-2016 | Norway | 60.5308 | 4.98519 |
| *Lithoderma* sp. | *Lithoderma* sp. 1GWS | GWS040835 | MN184517 |  |  | 11-Jun-2016 | Norway | 60.4425 | 5.06462 |
| *Lithoderma* sp. | *Lithoderma* sp. 1NB | GWS014055 | MN184520 | MN184569 |  | 07-Sep-2010 | Canada, New Brunswick | 45.072 | -66.469 |
| *Lithoderma* sp. | *Lithoderma* sp. 1NS | GWS032084 | MN184309 | MN184537 |  | 14-Aug-2012 | Canada, Nova Scotia | 44.568 | -64.036 |
| *Lithoderma* sp. | *Lithoderma* sp. 2GWS | GWS032060A |  | MH277266 |  | 14-Aug-2012 | Canada, Nova Scotia | 44.568 | -64.036 |
| *Lithoderma* sp. | *Lithoderma* sp. 3GWS | GWS030926 | MN184323 | MN184540 |  | 13-Jun-2012 | Canada, British Columbia | 52.465 | -131.439 |
| *Mesogloia vermiculata* | *Mesogloia vermiculata* | GWS039853 | MN184277 |  |  | 05-Jun-2016 | Norway | 60.2692 | 5.22123 |
| *Mesogloia vermiculata* | *Mesogloia vermiculata* | GWS038050 | MN184401 |  |  | 03-Jun-2016 | Norway | 60.2412 | 5.2021 |
| *Myrionema strangulans* | *Myrionema strangulans* | GWS040808 | MN184292 |  |  | 10-Jun-2016 | Norway | 60.1762 | 5.11132 |
| *Myriotrichia* sp. | *Myriotrichia* sp. 1Norway | GWS040650 | MN184355 |  |  | 09-Jun-2016 | Norway | 60.1847 | 5.14938 |
| *Pelvetia canaliculata* | *Pelvetia canaliculata* | 2016_BIO309A_88 | MN184416 |  |  | 17-Apr-2016 | Norway | 60.27 | 5.221 |
| *Pelatonia* sp. | *Petalonia* sp. crust1 | 2016_BIO309A_57 | MN184504 |  |  | 19-Apr-2016 | Norway | 60.114 | 5.067 |
| *Planosiphon zosterifolius* | *Planosiphon zosterifolius* | 2016_BIO309A_55 | MH309652 |  |  | 19-Apr-2016 | Norway | 60.114 | 5.067 |
| *Punctaria latifolia* | *Punctaria latifolia* | GWS038014 | MN184359 |  |  | 03-Jun-2016 | Norway | 60.2412 | 5.2021 |
| *Pylaiella littoralis* | *Pylaiella* *littoralis* | GWS038043 | MH309522 |  |  | 03-Jun-2016 | Norway | 60.2412 | 5.2021 |
| *Pylaiella varia* | *Pylaiella* *varia* | 2016_BIO309A_37 | KY572639 |  |  | 17-Apr-2016 | Norway | 60.27 | 5.221 |
| *Pylaiella varia* | *Pylaiella* *varia* | GWS038076 | KY572269 |  |  | 03-Jun-2016 | Norway | 60.2692 | 5.22123 |
| *Saccharina latissima* | *Saccharina latissima* | 2016_BIO309A_13 | KY572465 |  |  | 14-Apr-2016 | Norway | 60.242 | 5.24 |
| *Saccharina latissima* | *Saccharina latissima* | GWS039992 | KY572709 |  |  | 07-Jun-2016 | Norway | 60.6627 | 4.78749 |
| *Saccharina latissima* | *Saccharina latissima* | GWS040873 | KY572600 |  |  | 11-Jun-2016 | Norway | 60.4425 | 5.06462 |
| *Saccharina latissima* | *Saccharina latissima* | GWS040655 | KY572296 |  |  | 09-Jun-2016 | Norway | 60.1847 | 5.14938 |
| *Saccharina latissima* | *Saccharina latissima* | GWS040097 | KY572425 |  |  | 08-Jun-2016 | Norway | 60.6627 | 4.78749 |
| *Saccharina latissima* | *Saccharina latissima* | GWS040092 | KY572759 |  |  | 08-Jun-2016 | Norway | 60.6627 | 4.78749 |
| *Saccharina latissima* | *Saccharina latissima* | GWS040067 | KY572700 |  |  | 08-Jun-2016 | Norway | 60.6627 | 4.78749 |
| *Saccharina latissima* | *Saccharina latissima* | GWS039851 | KY572514 |  |  | 05-Jun-2016 | Norway | 60.2692 | 5.22123 |
| *Saccharina latissima* | *Saccharina latissima* | GWS038029 | KY572608 |  |  | 03-Jun-2016 | Norway | 60.2412 | 5.2021 |
| *Saccharina latissima* | *Saccharina latissima* | GWS040802 | KY572466 |  |  | 10-Jun-2016 | Norway | 60.1762 | 5.11132 |
| *Saccharina latissima* | *Saccharina latissima* | GWS040671 | KY572385 |  |  | 09-Jun-2016 | Norway | 60.1847 | 5.14938 |
| *Saccharina latissima* | *Saccharina latissima* | GWS040638 | KY572199 |  |  | 09-Jun-2016 | Norway | 60.1847 | 5.14938 |
| *Saccharina latissima* | *Saccharina latissima* | GWS040632 | KY572340 |  |  | 09-Jun-2016 | Norway | 60.1847 | 5.14938 |
| *Saccharina latissima* | *Saccharina latissima* | GWS040609 | KY572797 |  |  | 09-Jun-2016 | Norway | 60.1847 | 5.14938 |
| *Saccorhiza polyschides* | *Saccorhiza polyschides* | GWS039905 | MN184348 |  |  | 06-Jun-2016 | Norway | 60.4977 | 4.91225 |
| *Sargassum muticum* | *Sargassum muticum* | 2016_BIO309A_52 | MN184364 |  |  | 19-Apr-2016 | Norway | 60.114 | 5.067 |
| *Sargassum muticum* | *Sargassum muticum* | GWS039855 | MN184284 |  |  | 05-Jun-2016 | Norway | 60.2692 | 5.22123 |
| *Sargassum muticum* | *Sargassum muticum* | GWS038034 | MN184280 |  |  | 03-Jun-2016 | Norway | 60.2412 | 5.2021 |
| *Scytosiphon promiscuus* | *Scytosiphon promiscuus* | 2016_BIO309A_65 | MN184483 | MN184562 |  | 19-Apr-2016 | Norway | 60.114 | 5.067 |
| *Scytosiphon* sp. | *Scytosiphon* sp. AtlanticComp | GWS039847 | MN184417 |  |  | 05-Jun-2016 | Norway | 60.2692 | 5.22123 |
| *Scytosiphon* sp. | *Scytosiphon* sp. AtlanticComp | GWS038075 | MN184238 |  |  | 03-Jun-2016 | Norway | 60.2692 | 5.22123 |
| *Scytosiphon* sp. | *Scytosiphon* sp. AtlanticComp | GWS040911 | MN184396 |  |  | 12-Jun-2016 | Norway | 60.5308 | 4.98519 |
| *Spermatochnus paradoxus* | *Spermatochnus paradoxus* | GWS040822 | MN184410 |  |  | 11-Jun-2016 | Norway | 60.4425 | 5.06462 |
| *Sphacelaria cirrosa* | *Sphacelaria cirrosa* | GWS038052 | MN184490 |  |  | 03-Jun-2016 | Norway | 60.2412 | 5.2021 |
| *Sphacelaria cirrosa* | *Sphacelaria cirrosa* | GWS038021 | MN184425 |  |  | 03-Jun-2016 | Norway | 60.2412 | 5.2021 |
| *Sphacelaria cirrosa* | *Sphacelaria cirrosa* | GWS040810 | MN184433 | MN184558 |  | 10-Jun-2016 | Norway | 60.1762 | 5.11132 |
| *Sphacelaria cirrosa* | *Sphacelaria cirrosa* | GWS040744 | MN184502 |  |  | 10-Jun-2016 | Norway | 60.1847 | 5.14938 |
| *Sphacelaria cirrosa* | *Sphacelaria cirrosa* | GWS038055 | MN184461 |  |  | 03-Jun-2016 | Norway | 60.2412 | 5.2021 |
| *Spongonema tomentosum* | *Spongonema tomentosum* | 2016_BIO309A_59 | MN184346 | MN184545 |  | 19-Apr-2016 | Norway | 60.114 | 5.067 |
| *Spongonema tomentosum* | *Spongonema tomentosum* | GWS039898 | MN184259 |  |  | 05-Jun-2016 | Norway | 60.4977 | 4.91225 |
| *Spongonema tomentosum* | *Spongonema tomentosum* | GWS039819 | MN184246 |  |  | 04-Jun-2016 | Norway | 60.4936 | 4.91898 |
| *Stictyosiphon soriferus* | *Stictyosiphon soriferus* | GWS040928 | MN184357 |  |  | 12-Jun-2016 | Norway | 60.5308 | 4.98519 |
| *Striaria attenuata* | *Striaria attenuata* | GWS038016 | MN184308 |  |  | 03-Jun-2016 | Norway | 60.2412 | 5.2021 |
| *Striaria attenuata* | *Striaria attenuata* | GWS040901 | MN184276 |  |  | 12-Jun-2016 | Norway | 60.5308 | 4.98519 |
| Tilopteridaleansp. | Tilopteridalean sp. 1GWS | GWS040790 | MH308862 |  |  | 10-Jun-2016 | Norway | 60.1762 | 5.11132 |
| Rhodophyta |  |  |  |  |  |  |  |  |  |
| *Aglaothamnion tenuissimum* | *Aglaothamnion tenuissimum* | GWS040780 | MN184314 | MN184538 |  | 10-Jun-2016 | Norway | 60.1762 | 5.11132 |
| *Ahnfeltia plicata* | *Ahnfeltia plicata* | GWS040964 | KY572512 |  |  | 13-Jun-2016 | Norway | 60.159 | 5.23564 |
| *Ahnfeltia plicata* | *Ahnfeltia plicata* | GWS040793 | KY572215 |  |  | 10-Jun-2016 | Norway | 60.1762 | 5.11132 |
| *Ahnfeltia plicata* | *Ahnfeltia plicata* | GWS040788 | MN184228 |  |  | 10-Jun-2016 | Norway | 60.1762 | 5.11132 |
| *Ahnfeltia plicata* | *Ahnfeltia plicata* | GWS040787 | KY572713 |  |  | 10-Jun-2016 | Norway | 60.1762 | 5.11132 |
| *Ahnfeltia plicata* | *Ahnfeltia plicata* | GWS040786 | KY572291 |  |  | 10-Jun-2016 | Norway | 60.1762 | 5.11132 |
| *Ahnfeltia plicata* | *Ahnfeltia plicata* | GWS040785 | KY572394 |  |  | 10-Jun-2016 | Norway | 60.1762 | 5.11132 |
| *Ahnfeltia plicata* | *Ahnfeltia plicata* | GWS040784 | KY572430 |  |  | 10-Jun-2016 | Norway | 60.1762 | 5.11132 |
| *Ahnfeltia plicata* | *Ahnfeltia plicata* | GWS040763 | KY572728 |  |  | 10-Jun-2016 | Norway | 60.1762 | 5.11132 |
| *Ahnfeltia plicata* | *Ahnfeltia plicata* | GWS040759 | KY572802 |  |  | 10-Jun-2016 | Norway | 60.1762 | 5.11132 |
| *Ahnfeltia plicata* | *Ahnfeltia plicata* | GWS040756 | KY572695 |  |  | 10-Jun-2016 | Norway | 60.1762 | 5.11132 |
| *Ahnfeltia plicata* | *Ahnfeltia plicata* | GWS040053 | KY572763 |  |  | 08-Jun-2016 | Norway | 60.6627 | 4.78749 |
| *Ahnfeltia plicata* | *Ahnfeltia plicata* | GWS040052 | KY572245 |  |  | 08-Jun-2016 | Norway | 60.6627 | 4.78749 |
| *Ahnfeltia plicata* | *Ahnfeltia plicata* | GWS040051 | KY572256 |  |  | 08-Jun-2016 | Norway | 60.6627 | 4.78749 |
| *Ahnfeltia plicata* | *Ahnfeltia plicata* | GWS039842 | KY572171 |  |  | 04-Jun-2016 | Norway | 60.4936 | 4.91898 |
| *Ahnfeltia plicata* | *Ahnfeltia plicata* | GWS039840 | KY572349 |  |  | 04-Jun-2016 | Norway | 60.4936 | 4.91898 |
| *Ahnfeltia plicata* | *Ahnfeltia plicata* | GWS039820 | KY572564 |  |  | 04-Jun-2016 | Norway | 60.4936 | 4.91898 |
| *Ahnfeltia plicata* | *Ahnfeltia plicata* | GWS039817 | KY572138 |  |  | 04-Jun-2016 | Norway | 60.4936 | 4.91898 |
| *Ahnfeltia plicata* | *Ahnfeltia plicata* | GWS039811 | KY572556 |  |  | 04-Jun-2016 | Norway | 60.4936 | 4.91898 |
| *Bangia* *fuscopurpurea* | *Bangia fuscopurpurea* | 2016_BIO309A_70 | MN184300 |  |  | 19-Apr-2016 | Norway | 60.114 | 5.067 |
| *Bonnemaisonia asperagoides* | *Bonnemaisonia asparagoides* | GWS040831 | MN184328 | MN184541 |  | 11-Jun-2016 | Norway | 60.4425 | 5.06462 |
| *Bonnemaisonia asperagoides* | *Bonnemaisonia asparagoides* | GWS040634 | MN184297 |  |  | 09-Jun-2016 | Norway | 60.1847 | 5.14938 |
| *Bonnemaisonia asperagoides* | *Bonnemaisonia asparagoides* | GWS040611 | MN184495 |  |  | 09-Jun-2016 | Norway | 60.1847 | 5.14938 |
| *Bonnemaisonia hamifera* | *Bonnemaisonia hamifera* | GWS040878 | MN184507 |  |  | 11-Jun-2016 | Norway | 60.4425 | 5.06462 |
| *Bonnemaisonia hamifera* | *Bonnemaisonia hamifera* | GWS039844 | MN184232 |  |  | 05-Jun-2016 | Norway | 60.2692 | 5.22123 |
| *Bonnemaisonia hamifera* | *Bonnemaisonia hamifera* | GWS038017 | MN184287 |  |  | 03-Jun-2016 | Norway | 60.2412 | 5.2021 |
| *Bonnemaisonia hamifera* | *Bonnemaisonia hamifera* | 2016_BIO309A_63 | MN184464 |  |  | 19-Apr-2016 | Norway | 60.114 | 5.067 |
| *Carradoriella elongata* | *Carradoriella elongata* | GWS040834 | MF409433 |  |  | 11-Jun-2016 | Norway | 60.4425 | 5.06462 |
| *Carradoriella elongata* | *Carradoriella elongata* | GWS040777 | MF409419 |  |  | 10-Jun-2016 | Norway | 60.1762 | 5.11132 |
| *Carradoriella elongata* | *Carradoriella elongata* | GWS040774 | MF409427 |  |  | 10-Jun-2016 | Norway | 60.1762 | 5.11132 |
| *Carradoriella elongata* | *Carradoriella elongata* | GWS040621 | MF409416 |  |  | 09-Jun-2016 | Norway | 60.1847 | 5.14938 |
| *Carradoriella elongata* | *Carradoriella elongata* | GWS038066 | MF409425 |  |  | 03-Jun-2016 | Norway | 60.2412 | 5.2021 |
| *Carradoriella elongata* | *Carradoriella elongata* | GWS038061 | MF409430 |  |  | 03-Jun-2016 | Norway | 60.2412 | 5.2021 |
| *Carradoriella elongata* | *Carradoriella elongata* | 2016_BIO309A_02 | MF409415 |  |  | 14-Apr-2016 | Norway | 60.242 | 5.24 |
| *Catenella caespitosa* | *Catenella caespitosa* | 2016_BIO309A_48 | MN184404 | MN184551 |  | 18-Apr-2016 | Norway | 60.26 | 5.212 |
| *Ceramium* *pallidum* | *Ceramium pallidum* | GWS039884 | MN184264 | MN184533 |  | 05-Jun-2016 | Norway | 60.4977 | 4.91225 |
| *Ceramium* *pallidum* | *Ceramium pallidum* | GWS039882 | MN184462 |  |  | 05-Jun-2016 | Norway | 60.4977 | 4.91225 |
| *Ceramium* *pallidum* | *Ceramium pallidum* | GWS039881 | MN184384 |  |  | 05-Jun-2016 | Norway | 60.4977 | 4.91225 |
| *Ceramium* *pallidum* | *Ceramium pallidum* | GWS039872 | MN184245 |  |  | 05-Jun-2016 | Norway | 60.6627 | 4.78749 |
| *Ceramium* *pallidum* | *Ceramium pallidum* | 2016_BIO309A_47 | MN184273 |  |  | 18-Apr-2016 | Norway | 60.26 | 5.212 |
| *Ceramium secundatum* | *Ceramium secundatum* | GWS038089 | MN184499 |  |  | 03-Jun-2016 | Norway | 60.2692 | 5.22123 |
| *Ceramium secundatum* | *Ceramium secundatum* | 2016_BIO309A_46 | MN184288 |  |  | 18-Apr-2016 | Norway | 60.26 | 5.212 |
| *Ceramium secundatum* | *Ceramium secundatum* | 2016_BIO309A_30 | MN184367 |  |  | 17-Apr-2016 | Norway | 60.27 | 5.221 |
| *Ceramium shuttleworthianum* | *Ceramium shuttleworthianum* | GWS039860 | MN184486 | MN184563 |  | 05-Jun-2016 | Norway | 60.6627 | 4.78749 |
| *Ceramium virgatum* | *Ceramium virgatum* | GWS038081 | KY572341 |  |  | 03-Jun-2016 | Norway | 60.2692 | 5.22123 |
| *Ceramium virgatum* | *Ceramium virgatum* | GWS040766 | KY572577 |  |  | 10-Jun-2016 | Norway | 60.1762 | 5.11132 |
| *Ceramium virgatum* | *Ceramium virgatum* | GWS040707 | KY572294 |  |  | 09-Jun-2016 | Norway | 60.1847 | 5.14938 |
| *Ceramium virgatum* | *Ceramium virgatum* | GWS040084 | KY572547 |  |  | 08-Jun-2016 | Norway | 60.6627 | 4.78749 |
| *Ceramium virgatum* | *Ceramium virgatum* | GWS039880 | KY572500 |  |  | 05-Jun-2016 | Norway | 60.4977 | 4.91225 |
| *Ceramium* sp. | *Ceramium* sp. | 2016_BIO309A_66 | MN184330 | MN184543 |  | 19-Apr-2016 | Norway | 60.114 | 5.067 |
| *Ceramium* sp. | *Ceramium* sp. MAR5 | RMAR1039 | KJ960533 |  |  | 15-Mar-2011 | France | 48.3815 | 4.91928 |
| *Ceramium* sp. | *Ceramium* sp. 1Norway | GWS040811 | MN184247 | MN184529 |  | 10-Jun-2016 | Norway | 60.1762 | 5.11132 |
| *Chondrus crispus* | *Chondrus crispus* | GWS040849 | KY572454 |  |  | 11-Jun-2016 | Norway | 60.4425 | 5.06462 |
| *Chondrus crispus* | *Chondrus crispus* | GWS040742 | KY572742 |  |  | 10-Jun-2016 | Norway | 60.1847 | 5.14938 |
| *Chondrus crispus* | *Chondrus crispus* | GWS039902 | KY572449 |  |  | 05-Jun-2016 | Norway | 60.4987 | 4.91362 |
| *Chondrus crispus* | *Chondrus crispus* | GWS039845 | KY572137 |  |  | 05-Jun-2016 | Norway | 60.2692 | 5.22123 |
| *Chondrus crispus* | *Chondrus crispus* | GWS038011 | KY572733 |  |  | 03-Jun-2016 | Norway | 60.2412 | 5.2021 |
| *Chondrus crispus* | *Chondrus crispus* | GWS040812 | MN184320 |  |  | 10-Jun-2016 | Norway | 60.1762 | 5.11132 |
| *Chylocladia verticillata* | *Chylocladia verticillata* | GWS039843 | MN184522 |  |  | 05-Jun-2016 | Norway | 60.2692 | 5.22123 |
| *Chylocladia verticillata* | *Chylocladia verticillata* | GWS038035 | MN184263 |  |  | 03-Jun-2016 | Norway | 60.2412 | 5.2021 |
| *Chylocladia verticillata* | *Chylocladia verticillata* | GWS038015 | MN184387 |  |  | 03-Jun-2016 | Norway | 60.2412 | 5.2021 |
| *Chylocladia verticillata* | *Chylocladia verticillata* | GWS040989 | MN184450 |  |  | 13-Jun-2016 | Norway | 60.159 | 5.23564 |
| *Chylocladia verticillata* | *Chylocladia verticillata* | GWS040804 | MN184272 |  |  | 10-Jun-2016 | Norway | 60.1762 | 5.11132 |
| *Chylocladia verticillata* | *Chylocladia verticillata* | GWS038053 | MN184485 |  |  | 03-Jun-2016 | Norway | 60.2412 | 5.2021 |
| *Coccotylus brodiei* | *Coccotylus brodiei* | GWS040993 | MF124261 |  |  | 13-Jun-2016 | Norway | 60.159 | 5.23564 |
| *Coccotylus brodiei* | *Coccotylus brodiei* | GWS040990 | MF124263 |  |  | 13-Jun-2016 | Norway | 60.159 | 5.23564 |
| *Coccotylus brodiei* | *Coccotylus brodiei* | GWS040980 | MF124262 |  |  | 13-Jun-2016 | Norway | 60.159 | 5.23564 |
| *Coccotylus brodiei* | *Coccotylus brodiei* | GWS040999 | KY572565 |  |  | 13-Jun-2016 | Norway | 60.159 | 5.23564 |
| *Coccotylus brodiei* | *Coccotylus brodiei* | GWS040988 | KY572530 |  |  | 13-Jun-2016 | Norway | 60.159 | 5.23564 |
| *Coccotylus brodiei* | *Coccotylus brodiei* | GWS040979 | KY572717 |  |  | 13-Jun-2016 | Norway | 60.159 | 5.23564 |
| *Coccotylus brodiei* | *Coccotylus brodiei* | GWS040978 | KY572136 |  |  | 13-Jun-2016 | Norway | 60.159 | 5.23564 |
| *Coccotylus brodiei* | *Coccotylus brodiei* | GWS040977 | KY572604 |  |  | 13-Jun-2016 | Norway | 60.159 | 5.23564 |
| *Coccotylus brodiei* | *Coccotylus brodiei* | GWS040976 | KY572775 |  |  | 13-Jun-2016 | Norway | 60.159 | 5.23564 |
| *Coccotylus brodiei* | *Coccotylus brodiei* | GWS040975 | KY572243 |  |  | 13-Jun-2016 | Norway | 60.159 | 5.23564 |
| *Coccotylus brodiei* | *Coccotylus brodiei* | GWS040974 | KY572504 |  |  | 13-Jun-2016 | Norway | 60.159 | 5.23564 |
| *Coccotylus brodiei* | *Coccotylus brodiei* | GWS040973 | KY572436 |  |  | 13-Jun-2016 | Norway | 60.159 | 5.23564 |
| *Coccotylus brodiei* | *Coccotylus brodiei* | GWS040972 | KY572413 |  |  | 13-Jun-2016 | Norway | 60.159 | 5.23564 |
| *Coccotylus brodiei* | *Coccotylus brodiei* | GWS040893 | KY572410 |  |  | 12-Jun-2016 | Norway | 60.5308 | 4.98519 |
| *Coccotylus brodiei* | *Coccotylus brodiei* | GWS040823 | KY572397 |  |  | 11-Jun-2016 | Norway | 60.4425 | 5.06462 |
| *Coccotylus brodiei* | *Coccotylus brodiei* | GWS040805 | KY572696 |  |  | 10-Jun-2016 | Norway | 60.1762 | 5.11132 |
| *Coccotylus brodiei* | *Coccotylus brodiei* | GWS040799 | KY572434 |  |  | 10-Jun-2016 | Norway | 60.1762 | 5.11132 |
| *Coccotylus brodiei* | *Coccotylus brodiei* | GWS040789 | KY572643 |  |  | 10-Jun-2016 | Norway | 60.1762 | 5.11132 |
| *Coccotylus brodiei* | *Coccotylus brodiei* | GWS040783 | KY572557 |  |  | 10-Jun-2016 | Norway | 60.1762 | 5.11132 |
| *Coccotylus brodiei* | *Coccotylus brodiei* | GWS040769 | KY572590 |  |  | 10-Jun-2016 | Norway | 60.1762 | 5.11132 |
| *Coccotylus brodiei* | *Coccotylus brodiei* | GWS040768 | KY572488 |  |  | 10-Jun-2016 | Norway | 60.1762 | 5.11132 |
| *Coccotylus brodiei* | *Coccotylus brodiei* | GWS040753 | KY572567 |  |  | 10-Jun-2016 | Norway | 60.1762 | 5.11132 |
| *Coccotylus brodiei* | *Coccotylus brodiei* | GWS040736 | KY572749 |  |  | 10-Jun-2016 | Norway | 60.1847 | 5.14938 |
| *Coccotylus brodiei* | *Coccotylus brodiei* | GWS040730 | KY572752 |  |  | 10-Jun-2016 | Norway | 60.1847 | 5.14938 |
| *Coccotylus brodiei* | *Coccotylus brodiei* | GWS040651 | KY572537 |  |  | 09-Jun-2016 | Norway | 60.1847 | 5.14938 |
| *Coccotylus brodiei* | *Coccotylus brodiei* | GWS040643 | KY572418 |  |  | 09-Jun-2016 | Norway | 60.1847 | 5.14938 |
| *Coccotylus brodiei* | *Coccotylus brodiei* | GWS040604 | KY572817 |  |  | 09-Jun-2016 | Norway | 60.1847 | 5.14938 |
| *Coccotylus brodiei* | *Coccotylus brodiei* | GWS040603 | KY572755 |  |  | 09-Jun-2016 | Norway | 60.1847 | 5.14938 |
| *Coccotylus brodiei* | *Coccotylus brodiei* | GWS040966 | KY572750 |  |  | 13-Jun-2016 | Norway | 60.159 | 5.23564 |
| *Coccotylus brodiei* | *Coccotylus brodiei* | GWS040081 | KY572235 |  |  | 08-Jun-2016 | Norway | 60.6627 | 4.78749 |
| *Coccotylus brodiei* | *Coccotylus brodiei* | GWS040695 | KY572804 |  |  | 09-Jun-2016 | Norway | 60.1847 | 5.14938 |
| *Coccotylus truncatus* | *Coccotylus truncatus* | GWS040983 | MH143551 |  |  | 13-Jun-2016 | Norway | 60.159 | 5.23564 |
| *Corallina officinalis* | *Corallina officinalis* | GWS040647 | MN184270 |  |  | 09-Jun-2016 | Norway | 60.1847 | 5.14938 |
| *Corallina officinalis* | *Corallina officinalis* | GWS039835 | MN184408 |  |  | 04-Jun-2016 | Norway | 60.4936 | 4.91898 |
| *Corallina officinalis* | *Corallina officinalis* | GWS038079 | MN184366 |  |  | 03-Jun-2016 | Norway | 60.2692 | 5.22123 |
| *Corallina officinalis* | *Corallina officinalis* | GWS038012 | MN184443 |  |  | 03-Jun-2016 | Norway | 60.2412 | 5.2021 |
| *Corallina officinalis* | *Corallina officinalis* | 2016_BIO309A_80 | MN184257 |  |  | 19-Apr-2016 | Norway | 60.114 | 5.067 |
| *Cryptopleura ramosa* | *Cryptopleura ramosa* | GWS040074 | MN184362 |  |  | 08-Jun-2016 | Norway | 60.6627 | 4.78749 |
| *Cryptopleura ramosa* | *Cryptopleura ramosa* | GWS040036 | MN184424 |  |  | 07-Jun-2016 | Norway | 60.6627 | 4.78749 |
| *Cryptopleura ramosa* | *Cryptopleura ramosa* | GWS040035 | MN184249 |  |  | 07-Jun-2016 | Norway | 60.6627 | 4.78749 |
| *Cryptopleura ramosa* | *Cryptopleura ramosa* | GWS040945 | MN184266 | MN184534 |  | 13-Jun-2016 | Norway | 60.159 | 5.00405 |
| *Cryptopleura ramosa* | *Cryptopleura ramosa* | GWS040940 | MN184383 |  |  | 13-Jun-2016 | Norway | 60.159 | 5.00405 |
| *Cystoclonium purpureum* | *Cystoclonium purpureum* | GWS040864 | KY572499 |  |  | 11-Jun-2016 | Norway | 60.4425 | 5.06462 |
| *Cystoclonium purpureum* | *Cystoclonium purpureum* | GWS040829 | KY572367 |  |  | 11-Jun-2016 | Norway | 60.4425 | 5.06462 |
| *Cystoclonium purpureum* | *Cystoclonium purpureum* | GWS040996 | KY572771 |  |  | 13-Jun-2016 | Norway | 60.159 | 5.23564 |
| *Cystoclonium purpureum* | *Cystoclonium purpureum* | GWS040881 | KY572658 |  |  | 12-Jun-2016 | Norway | 60.5308 | 4.98519 |
| *Cystoclonium purpureum* | *Cystoclonium purpureum* | GWS040837 | KY572411 |  |  | 11-Jun-2016 | Norway | 60.4425 | 5.06462 |
| *Cystoclonium purpureum* | *Cystoclonium purpureum* | GWS040754 | KY572735 |  |  | 10-Jun-2016 | Norway | 60.1762 | 5.11132 |
| *Cystoclonium purpureum* | *Cystoclonium purpureum* | GWS040745 | KY572457 |  |  | 10-Jun-2016 | Norway | 60.1847 | 5.14938 |
| *Cystoclonium purpureum* | *Cystoclonium purpureum* | GWS040657 | KY572391 |  |  | 09-Jun-2016 | Norway | 60.1847 | 5.14938 |
| *Cystoclonium purpureum* | *Cystoclonium purpureum* | GWS039837 | KY572526 |  |  | 04-Jun-2016 | Norway | 60.4936 | 4.91898 |
| *Cystoclonium purpureum* | *Cystoclonium purpureum* | GWS038045 | KY572682 |  |  | 03-Jun-2016 | Norway | 60.2412 | 5.2021 |
| *Cystoclonium purpureum* | *Cystoclonium purpureum* | GWS038037 | KY572566 |  |  | 03-Jun-2016 | Norway | 60.2412 | 5.2021 |
| *Cystoclonium purpureum* | *Cystoclonium purpureum* | GWS038023 | KY572172 |  |  | 03-Jun-2016 | Norway | 60.2412 | 5.2021 |
| *Cystoclonium purpureum* | *Cystoclonium purpureum* | 2016_BIO309A_05 | KY572383 |  |  | 14-Apr-2016 | Norway | 60.242 | 5.24 |
| *Dasysiphonia japonica* | *Dasysiphonia japonica* | GWS040967 | MN184453 |  |  | 13-Jun-2016 | Norway | 60.159 | 5.23564 |
| *Dasysiphonia japonica* | *Dasysiphonia japonica* | GWS040892 | MN184243 |  |  | 12-Jun-2016 | Norway | 60.5308 | 4.98519 |
| *Dasysiphonia japonica* | *Dasysiphonia japonica* | GWS040862 | MN184500 |  |  | 11-Jun-2016 | Norway | 60.4425 | 5.06462 |
| *Dasysiphonia japonica* | *Dasysiphonia japonica* | GWS040073 | MN184269 |  |  | 08-Jun-2016 | Norway | 60.6627 | 4.78749 |
| *Dasysiphonia japonica* | *Dasysiphonia japonica* | GWS040031 | MN184294 |  |  | 07-Jun-2016 | Norway | 60.6627 | 4.78749 |
| *Dasysiphonia japonica* | *Dasysiphonia japonica* | GWS040000 | MN184347 |  |  | 07-Jun-2016 | Norway | 60.6627 | 4.78749 |
| *Dasysiphonia japonica* | *Dasysiphonia japonica* | GWS039857 | MN184415 |  |  | 05-Jun-2016 | Norway | 60.2692 | 5.22123 |
| *Dasysiphonia japonica* | *Dasysiphonia japonica* | GWS040054 | MN184421 |  |  | 08-Jun-2016 | Norway | 60.6627 | 4.78749 |
| *Dasysiphonia japonica* | *Dasysiphonia japonica* | 2016_BIO309A_04 | MN184316 |  |  | 14-Apr-2016 | Norway | 60.162 | 5.04 |
| *Dasysiphonia japonica* | *Dasysiphonia japonica* | GWS040041 | MN184439 |  |  | 07-Jun-2016 | Norway | 60.6627 | 4.78749 |
| *Delesseria sanguinea* | *Delesseria sanguinea* | GWS040673 | MN184333 |  |  | 09-Jun-2016 | Norway | 60.1847 | 5.14938 |
| *Delesseria sanguinea* | *Delesseria sanguinea* | GWS040961 | MN184481 |  |  | 13-Jun-2016 | Norway | 60.159 | 5.00405 |
| *Delesseria sanguinea* | *Delesseria sanguinea* | GWS040099 | MN184436 |  |  | 08-Jun-2016 | Norway | 60.6627 | 4.78749 |
| *Delesseria sanguinea* | *Delesseria sanguinea* | GWS040066 | MN184261 |  |  | 08-Jun-2016 | Norway | 60.6627 | 4.78749 |
| *Delesseria sanguinea* | *Delesseria sanguinea* | GWS040024 | MN184310 |  |  | 07-Jun-2016 | Norway | 60.6627 | 4.78749 |
| *Delesseria sanguinea* | *Delesseria sanguinea* | GWS039923 | MN184279 |  |  | 06-Jun-2016 | Norway | 60.4977 | 4.91225 |
| *Delesseria sanguinea* | *Delesseria sanguinea* | GWS039849 | MN184335 |  |  | 05-Jun-2016 | Norway | 60.2692 | 5.22123 |
| *Delesseria sanguinea* | *Delesseria sanguinea* | GWS038058 | MN184337 |  |  | 03-Jun-2016 | Norway | 60.2412 | 5.2021 |
| *Delesseria sanguinea* | *Delesseria sanguinea* | GWS038056 | MN184478 |  |  | 03-Jun-2016 | Norway | 60.2412 | 5.2021 |
| *Delesseria sanguinea* | *Delesseria sanguinea* | GWS040971 | MN184394 | MN184549 |  | 13-Jun-2016 | Norway | 60.159 | 5.23564 |
| *Delesseria sanguinea* | *Delesseria sanguinea* | 2016_BIO309A_12 | MN184460 |  |  | 14-Apr-2016 | Norway | 60.242 | 5.24 |
| *Delesseria sanguinea* | *Delesseria sanguinea* | 2016_BIO309A_11 | MN184329 |  |  | 14-Apr-2016 | Norway | 60.242 | 5.24 |
| *Dilsea carnosa* | *Dilsea carnosa* | GWS040765 | KY572546 |  |  | 10-Jun-2016 | Norway | 60.1762 | 5.11132 |
| *Dilsea carnosa* | *Dilsea carnosa* | GWS040660 | KY572327 |  |  | 09-Jun-2016 | Norway | 60.1847 | 5.14938 |
| *Dilsea carnosa* | *Dilsea carnosa* | GWS040644 | KY572573 |  |  | 09-Jun-2016 | Norway | 60.1847 | 5.14938 |
| *Dilsea carnosa* | *Dilsea carnosa* | GWS040062 | KY572611 |  |  | 08-Jun-2016 | Norway | 60.6627 | 4.78749 |
| *Dilsea carnosa* | *Dilsea carnosa* | GWS040046 | KY572486 |  |  | 08-Jun-2016 | Norway | 60.6627 | 4.78749 |
| *Dumontia contorta* | *Dumontia contorta* | 2016_BIO309A_28 | MN184356 |  |  | 17-Apr-2016 | Norway | 60.27 | 5.221 |
| *Erythrodermis traillii* | *Erythrodermis traillii* | GWS040767 | MN184455 |  |  | 10-Jun-2016 | Norway | 60.1762 | 5.11132 |
| *Erythrodermis traillii* | *Erythrodermis traillii* | GWS040637 | MN184361 |  |  | 09-Jun-2016 | Norway | 60.1847 | 5.14938 |
| *Erythrodermis traillii* | *Erythrodermis traillii* | GWS040635 | MH143564 |  |  | 09-Jun-2016 | Norway | 60.1847 | 5.14938 |
| *Euthora cristata* | *Euthora cristata* | GWS040856 | KY572685 |  |  | 11-Jun-2016 | Norway | 60.4425 | 5.06462 |
| *Euthora cristata* | *Euthora cristata* | GWS040686 | KY572313 |  |  | 09-Jun-2016 | Norway | 60.1847 | 5.14938 |
| *Euthora cristata* | *Euthora cristata* | GWS040685 | KY572812 |  |  | 09-Jun-2016 | Norway | 60.1847 | 5.14938 |
| *Euthora cristata* | *Euthora cristata* | GWS040683 | KY572184 |  |  | 09-Jun-2016 | Norway | 60.1847 | 5.14938 |
| *Euthora cristata* | *Euthora cristata* | GWS040668 | KY572357 |  |  | 09-Jun-2016 | Norway | 60.1847 | 5.14938 |
| *Euthora cristata* | *Euthora cristata* | GWS040667 | KY572164 |  |  | 09-Jun-2016 | Norway | 60.1847 | 5.14938 |
| *Euthora cristata* | *Euthora cristata* | GWS040642 | KY572833 |  |  | 09-Jun-2016 | Norway | 60.1847 | 5.14938 |
| *Euthora cristata* | *Euthora cristata* | GWS040641 | KY572601 |  |  | 09-Jun-2016 | Norway | 60.1847 | 5.14938 |
| *Euthora cristata* | *Euthora cristata* | GWS040633 | KY572211 |  |  | 09-Jun-2016 | Norway | 60.1847 | 5.14938 |
| *Euthora cristata* | *Euthora cristata* | GWS040630 | KY572684 |  |  | 09-Jun-2016 | Norway | 60.1847 | 5.14938 |
| *Euthora cristata* | *Euthora cristata* | GWS040629 | KY572297 |  |  | 09-Jun-2016 | Norway | 60.1847 | 5.14938 |
| *Euthora cristata* | *Euthora cristata* | GWS040628 | KY572638 |  |  | 09-Jun-2016 | Norway | 60.1847 | 5.14938 |
| *Euthora cristata* | *Euthora cristata* | GWS040616 | KY572545 |  |  | 09-Jun-2016 | Norway | 60.1847 | 5.14938 |
| *Euthora cristata* | *Euthora cristata* | GWS040615 | KY572447 |  |  | 09-Jun-2016 | Norway | 60.1847 | 5.14938 |
| *Euthora cristata* | *Euthora cristata* | GWS040614 | KY572156 |  |  | 09-Jun-2016 | Norway | 60.1847 | 5.14938 |
| *Euthora cristata* | *Euthora cristata* | GWS040606 | KY572484 |  |  | 09-Jun-2016 | Norway | 60.1847 | 5.14938 |
| *Euthora cristata* | *Euthora cristata* | GWS040600 | KY572216 |  |  | 09-Jun-2016 | Norway | 60.1847 | 5.14938 |
| *Euthora cristata* | *Euthora cristata* | GWS040025 | KY572654 |  |  | 07-Jun-2016 | Norway | 60.6627 | 4.78749 |
| *Euthora cristata* | *Euthora cristata* | GWS040009 | KY572346 |  |  | 07-Jun-2016 | Norway | 60.6627 | 4.78749 |
| *Euthora cristata* | *Euthora cristata* | GWS040008 | KY572808 |  |  | 07-Jun-2016 | Norway | 60.6627 | 4.78749 |
| *Euthora cristata* | *Euthora cristata* | GWS040007 | KY572405 |  |  | 07-Jun-2016 | Norway | 60.6627 | 4.78749 |
| *Euthora cristata* | *Euthora cristata* | GWS039976 | KY572316 |  |  | 06-Jun-2016 | Norway | 60.4936 | 4.91898 |
| *Euthora cristata* | *Euthora cristata* | GWS039975 | KY572286 |  |  | 06-Jun-2016 | Norway | 60.4936 | 4.91898 |
| *Euthora cristata* | *Euthora cristata* | GWS039974 | KY572708 |  |  | 06-Jun-2016 | Norway | 60.4936 | 4.91898 |
| *Euthora cristata* | *Euthora cristata* | GWS039973 | KY572267 |  |  | 06-Jun-2016 | Norway | 60.4936 | 4.91898 |
| *Euthora cristata* | *Euthora cristata* | GWS039972 | KY572773 |  |  | 06-Jun-2016 | Norway | 60.4936 | 4.91898 |
| *Euthora cristata* | *Euthora cristata* | GWS039971 | KY572538 |  |  | 06-Jun-2016 | Norway | 60.4936 | 4.91898 |
| *Euthora cristata* | *Euthora cristata* | GWS039970 | KY572569 |  |  | 06-Jun-2016 | Norway | 60.4936 | 4.91898 |
| *Euthora cristata* | *Euthora cristata* | 2016_BIO309A_01 | KY572597 |  |  | 14-Apr-2016 | Norway | 60.162 | 5.04 |
| *Fredericqia deveauniensis* | *Fredericqia deveauniensis* | GWS040930 | MN184465 |  |  | 12-Jun-2016 | Norway | 60.5308 | 4.98519 |
| *Gaillona* *seposita* | *Gaillona seposita* | GWS039861 | MN184250 | MN184530 |  | 05-Jun-2016 | Norway | 60.6627 | 4.78749 |
| *Gelidium spinosum* | *Gelidium spinosum* | GWS038078 | MN184444 |  |  | 03-Jun-2016 | Norway | 60.2692 | 5.22123 |
| *Gelidium spinosum* | *Gelidium spinosum* | GWS038077 | MN184445 |  |  | 03-Jun-2016 | Norway | 60.2692 | 5.22123 |
| *Gelidium spinosum* | *Gelidium spinosum* | 2016_BIO309A_81 | MN184351 |  |  | 19-Apr-2016 | Norway | 60.114 | 5.067 |
| *Gloiosiphonia capillaris* | *Gloiosiphonia capillaris* | 2016_BIO309A_49 | MN184299 |  |  | 19-Apr-2016 | Norway | 60.114 | 5.067 |
| *Griffithisia corallinoides* | *Griffithsia corallinoides* | GWS040895 | MN184321 | MN184539 |  | 12-Jun-2016 | Norway | 60.5308 | 4.98519 |
| *Griffithisia corallinoides* | *Griffithsia corallinoides* | GWS040867 | MN184488 |  |  | 11-Jun-2016 | Norway | 60.4425 | 5.06462 |
| *Griffithisia corallinoides* | *Griffithsia corallinoides* | GWS040824 | MN184235 |  |  | 11-Jun-2016 | Norway | 60.4425 | 5.06462 |
| *Halarachnion ligulatum* | *Halarachnion ligulatum* | GWS040828 | MN184312 |  |  | 11-Jun-2016 | Norway | 60.4425 | 5.06462 |
| *Haraldiophyllum bonnemaisonii* | *Haraldiophyllum bonnemaisonii* | GWS040080 | MN184370 | MN184546 |  | 08-Jun-2016 | Norway | 60.6627 | 4.78749 |
| *Heterosiphonia plumosa* | *Heterosiphonia plumosa* | GWS040690 | MN184231 | MN184525 |  | 09-Jun-2016 | Norway | 60.1847 | 5.14938 |
| *Heterosiphonia plumosa* | *Heterosiphonia plumosa* | GWS040648 | MN184514 |  |  | 09-Jun-2016 | Norway | 60.1847 | 5.14938 |
| *Hildenbrandia* sp*.* | *Hildenbrandia* sp. 1Arct | GWS040287 | MH309757 |  |  | 08-Sep-2014 | Canada, Newfoundland and Labrador | 59.298 | -63.524 |
| *Hildenbrandia* sp*.* | *Hildenbrandia* sp. 3GWS | GWS021414 | KM254887 |  |  | 15-May-2010 | United States, California | 37.183 | -122.389 |
| *Hildenbrandia* sp*.* | *Hildenbrandia* sp. 4GWS | GWS040997 | MN184519 |  |  | 13-Jun-2016 | Norway | 60.159 | 5.23564 |
| *Hildenbrandia* sp*.* | *Hildenbrandia* sp. 73GWS | GWS040426 | MN184340 |  |  | 11-Sep-2014 | Canada, Newfoundland and Labrador | 55.102 | -59.18 |
| *Leptosiphonia brodiei* | *Polysiphonia brodiei* | GWS039883 | MN184467 |  |  | 05-Jun-2016 | Norway | 60.4977 | 4.91225 |
| *Leptosiphonia brodiei* | *Polysiphonia brodiei* | 2016_BIO309A_75 | MN184353 |  |  | 19-Apr-2016 | Norway | 60.114 | 5.067 |
| *Leptosiphonia fibrillosa* | *Leptosiphonia fibrillosa* | GWS040914 | MF409418 |  |  | 12-Jun-2016 | Norway | 60.5308 | 4.98519 |
| *Leptosiphonia fibrillosa* | *Leptosiphonia fibrillosa* | GWS040869 | MF409422 |  |  | 11-Jun-2016 | Norway | 60.4425 | 5.06462 |
| *Leptosiphonia fibrillosa* | *Leptosiphonia fibrillosa* | GWS040833 | MF409420 |  |  | 11-Jun-2016 | Norway | 60.4425 | 5.06462 |
| *Leptosiphonia fibrillosa* | *Leptosiphonia fibrillosa* | GWS038049 | MF409429 |  |  | 03-Jun-2016 | Norway | 60.2412 | 5.2021 |
| *Leptosiphonia fibrillosa* | *Leptosiphonia fibrillosa* | GWS040913 | MF409421 |  |  | 12-Jun-2016 | Norway | 60.5308 | 4.98519 |
| *Leptosiphonia fibrillosa* | *Leptosiphonia fibrillosa* | 2016_BIO309A_18 | MF409434 |  |  | 14-Apr-2016 | Norway | 60.242 | 5.24 |
| *Lithothamnion glaciale* | *Lithothamnion glaciale* | CPVP-91 | KC861508 |  |  | 01-May-2008 | Norway | 60.1429 | 5.16632 |
| *Lithothamnion glaciale* | *Lithothamnion glaciale* | CPVP-1403 | KC861505 |  |  | 01-May-2008 | Norway | 60.1429 | 5.16632 |
| *Lithothamnion glaciale* | *Lithothamnion glaciale* | CPVP-93 | KC861503 |  |  | 01-May-2008 | Norway | 60.1429 | 5.16632 |
| *Lithothamnion glaciale* | *Lithothamnion glaciale* | CPVP-1401 | KC861504 |  |  | 01-May-2008 | Norway | 60.1429 | 5.16632 |
| *Lomentaria clavellosa* | *Lomentaria clavellosa* | GWS040064 | MN184349 |  |  | 08-Jun-2016 | Norway | 60.6627 | 4.78749 |
| *Lomentaria clavellosa* | *Lomentaria clavellosa* | GWS040055 | MN184324 |  |  | 08-Jun-2016 | Norway | 60.6627 | 4.78749 |
| *Lomentaria clavellosa* | *Lomentaria clavellosa* | GWS040034 | MN184293 |  |  | 07-Jun-2016 | Norway | 60.6627 | 4.78749 |
| *Lomentaria clavellosa* | *Lomentaria clavellosa* | GWS039950 | MN184477 |  |  | 06-Jun-2016 | Norway | 60.4936 | 4.91898 |
| *Lomentaria clavellosa* | *Lomentaria clavellosa* | GWS040920 | MN184358 |  |  | 12-Jun-2016 | Norway | 60.5308 | 4.98519 |
| *Lomentaria clavellosa* | *Lomentaria clavellosa* | GWS040075 | MN184278 |  |  | 08-Jun-2016 | Norway | 60.6627 | 4.78749 |
| *Lomentaria clavellosa* | *Lomentaria clavellosa* | GWS040711 | MN184338 |  |  | 09-Jun-2016 | Norway | 60.1847 | 5.14938 |
| *Lomentaria clavellosa* | *Lomentaria clavellosa* | GWS040065 | MN184476 |  |  | 08-Jun-2016 | Norway | 60.6627 | 4.78749 |
| *Lomentaria clavellosa* | *Lomentaria clavellosa* | GWS040050 | MN184403 |  |  | 08-Jun-2016 | Norway | 60.6627 | 4.78749 |
| *Lomentaria clavellosa* | *Lomentaria clavellosa* | GWS040023 | MN184248 |  |  | 07-Jun-2016 | Norway | 60.6627 | 4.78749 |
| *Lomentaria clavellosa* | *Lomentaria clavellosa* | GWS040022 | MN184422 |  |  | 07-Jun-2016 | Norway | 60.6627 | 4.78749 |
| *Lomentaria clavellosa* | *Lomentaria clavellosa* | GWS040021 | MN184378 |  |  | 07-Jun-2016 | Norway | 60.6627 | 4.78749 |
| *Lomentaria clavellosa* | *Lomentaria clavellosa* | GWS038044 | MN184371 |  |  | 03-Jun-2016 | Norway | 60.2412 | 5.2021 |
| *Lomentaria orcadensis* | *Lomentaria orcadensis* | GWS040693 | MN184388 |  |  | 09-Jun-2016 | Norway | 60.1847 | 5.14938 |
| *Lomentaria* sp. | *Lomentaria* sp. 1Norway | 2016_BIO309A_16 | MN184234 | MN184526 |  | 14-Apr-2016 | Norway | 60.162 | 5.04 |
| *Mastocarpus stellatus* | *Mastocarpus stellatus* | GWS040905 | MH143530 |  |  | 12-Jun-2016 | Norway | 60.5308 | 4.98519 |
| *Mastocarpus stellatus* | *Mastocarpus stellatus* | GWS039873 | MN184258 |  |  | 05-Jun-2016 | Norway | 60.6627 | 4.78749 |
| *Mastocarpus stellatus* | *Mastocarpus stellatus* | GWS038097 | MN184405 |  |  | 04-Jun-2016 | Norway | 60.4936 | 4.91898 |
| *Mastocarpus stellatus* | *Mastocarpus stellatus* | GWS034989 | KY572494 |  |  | 04-Jun-2016 | Norway | 60.4936 | 4.91898 |
| *Mastocarpus stellatus* | *Mastocarpus stellatus* | 2016_BIO309A_32 | MN184331 |  |  | 17-Apr-2016 | Norway | 60.27 | 5.221 |
| *Membranoptera alata* | *Membranoptera alata* | GWS040958 | MN184518 |  |  | 13-Jun-2016 | Norway | 60.159 | 5.00405 |
| *Membranoptera alata* | *Membranoptera alata* | GWS040001 | MN184262 |  |  | 07-Jun-2016 | Norway | 60.6627 | 4.78749 |
| *Membranoptera alata* | *Membranoptera alata* | GWS039810 | MN184399 |  |  | 04-Jun-2016 | Norway | 60.4936 | 4.91898 |
| *Membranoptera alata* | *Membranoptera alata* | GWS038096 | MN184496 |  |  | 04-Jun-2016 | Norway | 60.4936 | 4.91898 |
| *Membranoptera alata* | *Membranoptera alata* | GWS038046 | MN184398 |  |  | 03-Jun-2016 | Norway | 60.2412 | 5.2021 |
| *Membranoptera alata* | *Membranoptera alata* | 2016_BIO309A_17 | MN184418 |  |  | 14-Apr-2016 | Norway | 60.162 | 5.04 |
| *Membranoptera alata* | *Membranoptera alata* | GWS030214 | MN184492 |  |  | 01-Apr-2012 | Norway | 60.17 | 4.985 |
| *Meredithia microphylla* | *Meredithia microphylla* | GWS040886 | MN184296 |  |  | 12-Jun-2016 | Norway | 60.5308 | 4.98519 |
| *Metacallophyllis laciniata* | *Metacallophyllis laciniata* | GWS040002 | MN184369 |  |  | 07-Jun-2016 | Norway | 60.6627 | 4.78749 |
| *Metacallophyllis laciniata* | *Metacallophyllis laciniata* | GWS039979 | MN184516 |  |  | 06-Jun-2016 | Norway | 60.4936 | 4.91898 |
| *Metacallophyllis laciniata* | *Metacallophyllis laciniata* | GWS039978 | MN184451 |  |  | 06-Jun-2016 | Norway | 60.4936 | 4.91898 |
| *Metacallophyllis laciniata* | *Metacallophyllis laciniata* | GWS039977 | MN184511 |  |  | 06-Jun-2016 | Norway | 60.4936 | 4.91898 |
| *Metacallophyllis laciniata* | *Metacallophyllis laciniata* | GWS040846 | MN184449 |  |  | 11-Jun-2016 | Norway | 60.4425 | 5.06462 |
| *Metacallophyllis laciniata* | *Metacallophyllis laciniata* | GWS040096 | MN184390 |  |  | 08-Jun-2016 | Norway | 60.6627 | 4.78749 |
| *Metacallophyllis laciniata* | *Metacallophyllis laciniata* | GWS040061 | MN184448 |  |  | 08-Jun-2016 | Norway | 60.6627 | 4.78749 |
| *Metacallophyllis laciniata* | *Metacallophyllis laciniata* | GWS040959 | MN184524 |  |  | 13-Jun-2016 | Norway | 60.159 | 5.00405 |
| *Metacallophyllis laciniata* | *Metacallophyllis laciniata* | GWS040610 | MN184382 |  |  | 09-Jun-2016 | Norway | 60.1847 | 5.14938 |
| *Metacallophyllis laciniata* | *Metacallophyllis laciniata* | GWS040047 | MN184435 |  |  | 08-Jun-2016 | Norway | 60.6627 | 4.78749 |
| *Metacallophyllis laciniata* | *Metacallophyllis laciniata* | GWS040040 | MN184506 |  |  | 07-Jun-2016 | Norway | 60.6627 | 4.78749 |
| *Metacallophyllis laciniata* | *Metacallophyllis laciniata* | GWS040003 | MN184412 |  |  | 07-Jun-2016 | Norway | 60.6627 | 4.78749 |
| *Metacallophyllis laciniata* | *Metacallophyllis laciniata* | 2016_BIO309A_20 | MN184313 |  |  | 14-Apr-2016 | Norway | 60.162 | 5.04 |
| *Nitophyllum punctatum* | *Nitophyllum punctatum* | GWS040625 | KY682898 | KY682906 |  | 09-Jun-2016 | Norway | 60.1847 | 5.14938 |
| *Nitophyllum punctatum* | *Nitophyllum punctatum* | GWS040622 | MN184363 |  |  | 09-Jun-2016 | Norway | 60.1847 | 5.14938 |
| *Odonthalia dentata* | *Odonthalia dentata* | GWS040733 | KY572274 |  |  | 10-Jun-2016 | Norway | 60.1847 | 5.14938 |
| *Odonthalia dentata* | *Odonthalia dentata* | GWS040731 | KY572498 |  |  | 10-Jun-2016 | Norway | 60.1847 | 5.14938 |
| *Odonthalia dentata* | *Odonthalia dentata* | GWS040729 | KY572221 |  |  | 10-Jun-2016 | Norway | 60.1847 | 5.14938 |
| *Odonthalia dentata* | *Odonthalia dentata* | GWS040727 | KY572607 |  |  | 10-Jun-2016 | Norway | 60.1847 | 5.14938 |
| *Odonthalia dentata* | *Odonthalia dentata* | GWS040720 | KY572568 |  |  | 10-Jun-2016 | Norway | 60.1847 | 5.14938 |
| *Odonthalia dentata* | *Odonthalia dentata* | GWS040719 | KY572787 |  |  | 10-Jun-2016 | Norway | 60.1847 | 5.14938 |
| *Odonthalia dentata* | *Odonthalia dentata* | GWS040718 | KY572165 |  |  | 10-Jun-2016 | Norway | 60.1847 | 5.14938 |
| *Odonthalia dentata* | *Odonthalia dentata* | GWS040717 | KY572471 |  |  | 10-Jun-2016 | Norway | 60.1847 | 5.14938 |
| *Odonthalia dentata* | *Odonthalia dentata* | GWS040716 | KY572756 |  |  | 10-Jun-2016 | Norway | 60.1847 | 5.14938 |
| *Odonthalia dentata* | *Odonthalia dentata* | GWS040715 | KY572416 |  |  | 10-Jun-2016 | Norway | 60.1847 | 5.14938 |
| *Odonthalia dentata* | *Odonthalia dentata* | GWS040714 | KY572407 |  |  | 10-Jun-2016 | Norway | 60.1847 | 5.14938 |
| *Odonthalia dentata* | *Odonthalia dentata* | GWS040713 | KY572472 |  |  | 10-Jun-2016 | Norway | 60.1847 | 5.14938 |
| *Odonthalia dentata* | *Odonthalia dentata* | GWS040712 | KY572776 |  |  | 10-Jun-2016 | Norway | 60.1847 | 5.14938 |
| *Odonthalia dentata* | *Odonthalia dentata* | GWS040700 | KY572516 |  |  | 09-Jun-2016 | Norway | 60.1847 | 5.14938 |
| *Odonthalia dentata* | *Odonthalia dentata* | GWS040697 | KY572279 |  |  | 09-Jun-2016 | Norway | 60.1847 | 5.14938 |
| *Odonthalia dentata* | *Odonthalia dentata* | GWS040696 | KY572186 |  |  | 09-Jun-2016 | Norway | 60.1847 | 5.14938 |
| *Odonthalia dentata* | *Odonthalia dentata* | GWS040688 | KY572701 |  |  | 09-Jun-2016 | Norway | 60.1847 | 5.14938 |
| *Odonthalia dentata* | *Odonthalia dentata* | GWS040666 | KY572716 |  |  | 09-Jun-2016 | Norway | 60.1847 | 5.14938 |
| *Odonthalia dentata* | *Odonthalia dentata* | GWS040665 | KY572292 |  |  | 09-Jun-2016 | Norway | 60.1847 | 5.14938 |
| *Odonthalia dentata* | *Odonthalia dentata* | GWS040654 | KY572336 |  |  | 09-Jun-2016 | Norway | 60.1847 | 5.14938 |
| *Odonthalia dentata* | *Odonthalia dentata* | GWS040653 | KY572798 |  |  | 09-Jun-2016 | Norway | 60.1847 | 5.14938 |
| *Odonthalia dentata* | *Odonthalia dentata* | GWS040646 | KY572630 |  |  | 09-Jun-2016 | Norway | 60.1847 | 5.14938 |
| *Odonthalia dentata* | *Odonthalia dentata* | GWS040618 | KY572305 |  |  | 09-Jun-2016 | Norway | 60.1847 | 5.14938 |
| *Odonthalia dentata* | *Odonthalia dentata* | GWS040617 | KY572342 |  |  | 09-Jun-2016 | Norway | 60.1847 | 5.14938 |
| *Odonthalia dentata* | *Odonthalia dentata* | GWS040602 | KY572378 |  |  | 09-Jun-2016 | Norway | 60.1847 | 5.14938 |
| *Odonthalia dentata* | *Odonthalia dentata* | GWS040601 | KY572423 |  |  | 09-Jun-2016 | Norway | 60.1847 | 5.14938 |
| *Osmundea oederi* | *Osmundea oederi* | GWS038070 | MN184341 |  |  | 03-Jun-2016 | Norway | 60.2692 | 5.22123 |
| *Osmundea oederi* | *Osmundea oederi* | 2016_BIO309A_34 | MN184283 |  |  | 17-Apr-2016 | Norway | 60.27 | 5.221 |
| *Osmundea pinnatifida* | *Osmundea pinnatifida* | GWS039815 | MN184409 | MN184552 |  | 04-Jun-2016 | Norway | 60.4936 | 4.91898 |
| *Osmundea pinnatifida* | *Osmundea pinnatifida* | 2016_BIO309A_71 | MN184508 | MN184566 |  | 19-Apr-2016 | Norway | 60.114 | 5.067 |
| *Palmaria palmata* | *Palmaria palmata* | GWS040057 | KY572290 |  |  | 08-Jun-2016 | Norway | 60.6627 | 4.78749 |
| *Palmaria palmata* | *Palmaria palmata* | GWS040709 | KY572190 |  |  | 09-Jun-2016 | Norway | 60.1847 | 5.14938 |
| *Palmaria palmata* | *Palmaria palmata* | GWS040687 | KY572360 |  |  | 09-Jun-2016 | Norway | 60.1847 | 5.14938 |
| *Phycodrys rubens* | *Phycodrys rubens* | GWS039998 | KY572681 |  |  | 07-Jun-2016 | Norway | 60.6627 | 4.78749 |
| *Phycodrys rubens* | *Phycodrys rubens* | GWS039997 | KY572330 |  |  | 07-Jun-2016 | Norway | 60.6627 | 4.78749 |
| *Phycodrys rubens* | *Phycodrys rubens* | GWS039996 | KY572352 |  |  | 07-Jun-2016 | Norway | 60.6627 | 4.78749 |
| *Phycodrys rubens* | *Phycodrys rubens* | GWS039995 | KY572263 |  |  | 07-Jun-2016 | Norway | 60.6627 | 4.78749 |
| *Phycodrys rubens* | *Phycodrys rubens* | GWS039994 | KY572592 |  |  | 07-Jun-2016 | Norway | 60.6627 | 4.78749 |
| *Phycodrys rubens* | *Phycodrys rubens* | GWS039993 | KY572636 |  |  | 07-Jun-2016 | Norway | 60.6627 | 4.78749 |
| *Phycodrys rubens* | *Phycodrys rubens* | GWS039963 | KY572200 |  |  | 06-Jun-2016 | Norway | 60.4936 | 4.91898 |
| *Phycodrys rubens* | *Phycodrys rubens* | GWS039962 | KY572252 |  |  | 06-Jun-2016 | Norway | 60.4936 | 4.91898 |
| *Phycodrys rubens* | *Phycodrys rubens* | GWS039961 | KY572645 |  |  | 06-Jun-2016 | Norway | 60.4936 | 4.91898 |
| *Phycodrys rubens* | *Phycodrys rubens* | GWS039960 | KY572646 |  |  | 06-Jun-2016 | Norway | 60.4936 | 4.91898 |
| *Phycodrys rubens* | *Phycodrys rubens* | GWS039959 | KY572319 |  |  | 06-Jun-2016 | Norway | 60.4936 | 4.91898 |
| *Phycodrys rubens* | *Phycodrys rubens* | GWS039953 | KY572522 |  |  | 06-Jun-2016 | Norway | 60.4936 | 4.91898 |
| *Phycodrys rubens* | *Phycodrys rubens* | GWS039952 | KY572783 |  |  | 06-Jun-2016 | Norway | 60.4936 | 4.91898 |
| *Phycodrys rubens* | *Phycodrys rubens* | GWS039951 | KY572402 |  |  | 06-Jun-2016 | Norway | 60.4936 | 4.91898 |
| *Phycodrys rubens* | *Phycodrys rubens* | GWS039949 | KY572746 |  |  | 06-Jun-2016 | Norway | 60.4936 | 4.91898 |
| *Phycodrys rubens* | *Phycodrys rubens* | GWS039948 | KY572445 |  |  | 06-Jun-2016 | Norway | 60.4936 | 4.91898 |
| *Phycodrys rubens* | *Phycodrys rubens* | GWS039947 | KY572273 |  |  | 06-Jun-2016 | Norway | 60.4936 | 4.91898 |
| *Phycodrys rubens* | *Phycodrys rubens* | GWS039946 | KY572839 |  |  | 06-Jun-2016 | Norway | 60.4936 | 4.91898 |
| *Phycodrys rubens* | *Phycodrys rubens* | GWS039945 | KY572764 |  |  | 06-Jun-2016 | Norway | 60.4936 | 4.91898 |
| *Phycodrys rubens* | *Phycodrys rubens* | GWS039933 | KY572561 |  |  | 06-Jun-2016 | Norway | 60.4977 | 4.91225 |
| *Phycodrys rubens* | *Phycodrys rubens* | GWS039926 | KY572562 |  |  | 06-Jun-2016 | Norway | 60.4977 | 4.91225 |
| *Phycodrys rubens* | *Phycodrys rubens* | GWS039925 | KY572675 |  |  | 06-Jun-2016 | Norway | 60.4977 | 4.91225 |
| *Phycodrys rubens* | *Phycodrys rubens* | GWS039924 | KY572605 |  |  | 06-Jun-2016 | Norway | 60.4977 | 4.91225 |
| *Phycodrys rubens* | *Phycodrys rubens* | GWS039919 | KY572511 |  |  | 06-Jun-2016 | Norway | 60.4977 | 4.91225 |
| *Phycodrys rubens* | *Phycodrys rubens* | GWS039918 | KY572433 |  |  | 06-Jun-2016 | Norway | 60.4977 | 4.91225 |
| *Phycodrys rubens* | *Phycodrys rubens* | GWS039917 | KY572558 |  |  | 06-Jun-2016 | Norway | 60.4977 | 4.91225 |
| *Phycodrys rubens* | *Phycodrys rubens* | GWS039916 | KY572525 |  |  | 06-Jun-2016 | Norway | 60.4977 | 4.91225 |
| *Phycodrys rubens* | *Phycodrys rubens* | GWS039914 | KY572249 |  |  | 06-Jun-2016 | Norway | 60.4977 | 4.91225 |
| *Phycodrys rubens* | *Phycodrys rubens* | GWS039913 | KY572503 |  |  | 06-Jun-2016 | Norway | 60.4977 | 4.91225 |
| *Phycodrys rubens* | *Phycodrys rubens* | GWS039912 | KY572426 |  |  | 06-Jun-2016 | Norway | 60.4977 | 4.91225 |
| *Phycodrys rubens* | *Phycodrys rubens* | GWS038059 | KY572174 | MN184527 |  | 03-Jun-2016 | Norway | 60.2412 | 5.2021 |
| *Phycodrys rubens* | *Phycodrys rubens* | GWS040782 | KY572593 |  |  | 10-Jun-2016 | Norway | 60.1762 | 5.11132 |
| *Phycodrys rubens* | *Phycodrys rubens* | GWS040741 | KY572841 |  |  | 10-Jun-2016 | Norway | 60.1847 | 5.14938 |
| *Phycodrys rubens* | *Phycodrys rubens* | GWS040732 | KY572134 |  |  | 10-Jun-2016 | Norway | 60.1847 | 5.14938 |
| *Phycodrys rubens* | *Phycodrys rubens* | GWS040722 | KY572381 |  |  | 10-Jun-2016 | Norway | 60.1847 | 5.14938 |
| *Phycodrys rubens* | *Phycodrys rubens* | GWS040721 | KY572698 |  |  | 10-Jun-2016 | Norway | 60.1847 | 5.14938 |
| *Phycodrys rubens* | *Phycodrys rubens* | GWS040072 | KY572354 |  |  | 08-Jun-2016 | Norway | 60.6627 | 4.78749 |
| *Phycodrys rubens* | *Phycodrys rubens* | 2016_BIO309A_19 | KY572304 |  |  | 14-Apr-2016 | Norway | 60.162 | 5.04 |
| *Phycodrys rubens* | *Phycodrys rubens* | GWS040853 | KY572375 |  |  | 11-Jun-2016 | Norway | 60.4425 | 5.06462 |
| *Phycodrys rubens* | *Phycodrys rubens* | GWS040836 | KY572818 |  |  | 11-Jun-2016 | Norway | 60.4425 | 5.06462 |
| *Phycodrys rubens* | *Phycodrys rubens* | GWS040832 | KY572393 |  |  | 11-Jun-2016 | Norway | 60.4425 | 5.06462 |
| *Phycodrys rubens* | *Phycodrys rubens* | GWS040670 | KY572738 |  |  | 09-Jun-2016 | Norway | 60.1847 | 5.14938 |
| *Phycodrys rubens* | *Phycodrys rubens* | GWS040608 | KY572160 |  |  | 09-Jun-2016 | Norway | 60.1847 | 5.14938 |
| *Phycodrys rubens* | *Phycodrys rubens* | GWS040607 | KY572677 |  |  | 09-Jun-2016 | Norway | 60.1847 | 5.14938 |
| *Phycodrys rubens* | *Phycodrys rubens* | GWS039999 | KY572697 |  |  | 07-Jun-2016 | Norway | 60.6627 | 4.78749 |
| *Phycodrys* sp. | *Phycodrys* sp. 1NB | GWS040968 | KY572513 |  |  | 13-Jun-2016 | Norway | 60.159 | 5.23564 |
| *Phycodrys* sp. | *Phycodrys* sp. 1NB | GWS040868 | KY572796 |  |  | 11-Jun-2016 | Norway | 60.4425 | 5.06462 |
| *Phycodrys* sp. | *Phycodrys* sp. 1NB | GWS040855 | KY572335 |  |  | 11-Jun-2016 | Norway | 60.4425 | 5.06462 |
| *Phycodrys* sp. | *Phycodrys* sp. 1NB | GWS040854 | KY572627 |  |  | 11-Jun-2016 | Norway | 60.4425 | 5.06462 |
| *Phycodrys* sp. | *Phycodrys* sp. 1NB | GWS040984 | KY572653 |  |  | 13-Jun-2016 | Norway | 60.159 | 5.23564 |
| *Phycodrys* sp. | *Phycodrys* sp. 1NB | GWS040752 | KY572642 |  |  | 10-Jun-2016 | Norway | 60.1762 | 5.11132 |
| *Phycodrys* sp. | *Phycodrys* sp. 1NB | GWS040734 | KY572576 |  |  | 10-Jun-2016 | Norway | 60.1847 | 5.14938 |
| *Phycodrys* sp. | *Phycodrys* sp. 1NB | GWS040728 | KY572311 | MN184535 |  | 10-Jun-2016 | Norway | 60.1847 | 5.14938 |
| *Phycodrys* sp. | *Phycodrys* sp. 1NB | GWS040723 | KY572246 |  |  | 10-Jun-2016 | Norway | 60.1847 | 5.14938 |
| *Phycodrys* sp. | *Phycodrys* sp. 1NB | GWS040692 | KY572819 |  |  | 09-Jun-2016 | Norway | 60.1847 | 5.14938 |
| *Phycodrys* sp. | *Phycodrys* sp. 1NB | GWS040680 | KY572251 |  |  | 09-Jun-2016 | Norway | 60.1847 | 5.14938 |
| *Phycodrys* sp. | *Phycodrys* sp. 1NB | GWS040639 | KY572581 |  |  | 09-Jun-2016 | Norway | 60.1847 | 5.14938 |
| *Phycodrys* sp. | *Phycodrys* sp. 1NB | GWS040076 | KY572650 |  |  | 08-Jun-2016 | Norway | 60.6627 | 4.78749 |
| *Phycodrys* sp. | *Phycodrys* sp. 1NB | GWS040071 | KY572170 |  |  | 08-Jun-2016 | Norway | 60.6627 | 4.78749 |
| *Phycodrys* sp. | *Phycodrys* sp. 1NB | GWS040070 | KY572259 |  |  | 08-Jun-2016 | Norway | 60.6627 | 4.78749 |
| *Phycodrys* sp. | *Phycodrys* sp. 1NB | GWS040922 | KY572206 |  |  | 12-Jun-2016 | Norway | 60.5308 | 4.98519 |
| *Phycodrys* sp. | *Phycodrys* sp. 1NB | GWS040891 | KY572785 |  |  | 12-Jun-2016 | Norway | 60.5308 | 4.98519 |
| *Phycodrys* sp. | *Phycodrys* sp. 1NB | GWS040887 | KY572276 |  |  | 12-Jun-2016 | Norway | 60.5308 | 4.98519 |
| *Phycodrys* sp. | *Phycodrys* sp. 1NB | GWS040858 | KY572834 |  |  | 11-Jun-2016 | Norway | 60.4425 | 5.06462 |
| *Phycodrys* sp. | *Phycodrys* sp. 1NB | GWS040844 | KY572427 |  |  | 11-Jun-2016 | Norway | 60.4425 | 5.06462 |
| *Phycodrys* sp. | *Phycodrys* sp. 1NB | GWS040698 | KY572351 |  |  | 09-Jun-2016 | Norway | 60.1847 | 5.14938 |
| *Phycodrys* sp. | *Phycodrys* sp. 1NB | GWS040652 | KY572452 |  |  | 09-Jun-2016 | Norway | 60.1847 | 5.14938 |
| *Phyllophora crispa* | *Phyllophora crispa* | GWS040737 | MN184466 |  |  | 10-Jun-2016 | Norway | 60.1847 | 5.14938 |
| *Phyllophora crispa* | *Phyllophora crispa* | GWS040674 | MN184463 |  |  | 09-Jun-2016 | Norway | 60.1847 | 5.14938 |
| *Phyllophora crispa* | *Phyllophora crispa* | GWS040089 | MN184239 |  |  | 08-Jun-2016 | Norway | 60.6627 | 4.78749 |
| *Phyllophora crispa* | *Phyllophora crispa* | GWS040069 | MN184428 |  |  | 08-Jun-2016 | Norway | 60.6627 | 4.78749 |
| *Phyllophora crispa* | *Phyllophora crispa* | GWS040761 | MN184307 |  |  | 10-Jun-2016 | Norway | 60.1762 | 5.11132 |
| *Phyllophora crispa* | *Phyllophora crispa* | GWS040760 | MN184406 |  |  | 10-Jun-2016 | Norway | 60.1762 | 5.11132 |
| *Phyllophora crispa* | *Phyllophora crispa* | GWS040796 | MN184360 |  |  | 10-Jun-2016 | Norway | 60.1762 | 5.11132 |
| *Phyllophora crispa* | *Phyllophora crispa* | GWS040623 | MN184456 |  |  | 09-Jun-2016 | Norway | 60.1847 | 5.14938 |
| *Phyllophora crispa* | *Phyllophora crispa* | GWS040605 | MN184515 |  |  | 09-Jun-2016 | Norway | 60.1847 | 5.14938 |
| *Phyllophora pseudoceranoides* | *Phyllophora pseudoceranoides* | GWS040619 | MN184407 |  |  | 09-Jun-2016 | Norway | 60.1847 | 5.14938 |
| *Phyllophora pseudoceranoides* | *Phyllophora pseudoceranoides* | GWS040771 | MN184375 |  |  | 10-Jun-2016 | Norway | 60.1762 | 5.11132 |
| *Phyllophora pseudoceranoides* | *Phyllophora pseudoceranoides* | GWS040758 | MN184326 |  |  | 10-Jun-2016 | Norway | 60.1762 | 5.11132 |
| *Phyllophora pseudoceranoides* | *Phyllophora pseudoceranoides* | GWS040704 | MN184497 |  |  | 09-Jun-2016 | Norway | 60.1847 | 5.14938 |
| *Phyllophora pseudoceranoides* | *Phyllophora pseudoceranoides* | GWS040701 | MN184372 |  |  | 09-Jun-2016 | Norway | 60.1847 | 5.14938 |
| *Phyllophora pseudoceranoides* | *Phyllophora pseudoceranoides* | GWS040662 | MN184482 |  |  | 09-Jun-2016 | Norway | 60.1847 | 5.14938 |
| *Phyllophora pseudoceranoides* | *Phyllophora pseudoceranoides* | GWS040645 | MN184427 |  |  | 09-Jun-2016 | Norway | 60.1847 | 5.14938 |
| *Phyllophora pseudoceranoides* | *Phyllophora pseudoceranoides* | GWS040010 | MN184290 |  |  | 07-Jun-2016 | Norway | 60.6627 | 4.78749 |
| *Phyllophora pseudoceranoides* | *Phyllophora pseudoceranoides* | GWS038062 | MN184304 |  |  | 03-Jun-2016 | Norway | 60.2412 | 5.2021 |
| *Phyllophora pseudoceranoides* | *Phyllophora pseudoceranoides* | GWS038060 | MN184452 |  |  | 03-Jun-2016 | Norway | 60.2412 | 5.2021 |
| *Phyllophora pseudoceranoides* | *Phyllophora pseudoceranoides* | GWS038054 | MN184457 |  |  | 03-Jun-2016 | Norway | 60.2412 | 5.2021 |
| *Phyllophora pseudoceranoides* | *Phyllophora pseudoceranoides* | GWS040725 | MN184494 |  |  | 10-Jun-2016 | Norway | 60.1847 | 5.14938 |
| *Phyllophora pseudoceranoides* | *Phyllophora pseudoceranoides* | GWS040691 | MN184342 |  |  | 09-Jun-2016 | Norway | 60.1847 | 5.14938 |
| *Phyllophora pseudoceranoides* | *Phyllophora pseudoceranoides* | GWS040649 | MH143569 |  |  | 09-Jun-2016 | Norway | 60.1847 | 5.14938 |
| *Phyllophora pseudoceranoides* | *Phyllophora pseudoceranoides* | GWS039834 | MN184474 |  |  | 04-Jun-2016 | Norway | 60.4936 | 4.91898 |
| *Phyllophora pseudoceranoides* | *Phyllophora pseudoceranoides* | GWS040056 | MN184336 |  |  | 08-Jun-2016 | Norway | 60.6627 | 4.78749 |
| *Phymatolithon lenormandii* | *Phymatolithon lenormandii* | GWS018082 | HM915182 | MN184553 |  | 16-Apr-2010 | United States, Rhode Island | 41.479 | -71.361 |
| *Phymatolithon lenormandii* | *Phymatolithon lenormandii* | GWS038074 | MN184306 |  |  | 03-Jun-2016 | Norway | 60.2692 | 5.22123 |
| *Plocamium lyngbyanum* | *Plocamium lyngbyanum* | GWS040960 | MN184325 |  |  | 13-Jun-2016 | Norway | 60.159 | 5.00405 |
| *Plocamium lyngbyanum* | *Plocamium lyngbyanum* | GWS040952 | MN184365 |  |  | 13-Jun-2016 | Norway | 60.159 | 5.00405 |
| *Plocamium lyngbyanum* | *Plocamium lyngbyanum* | GWS040947 | MN184319 |  |  | 13-Jun-2016 | Norway | 60.159 | 5.00405 |
| *Plocamium lyngbyanum* | *Plocamium lyngbyanum* | GWS040944 | MN184491 |  |  | 13-Jun-2016 | Norway | 60.159 | 5.00405 |
| *Plocamium lyngbyanum* | *Plocamium lyngbyanum* | 2016_BIO309A_03 | MN184241 |  |  | 14-Apr-2016 | Norway | 60.162 | 5.04 |
| *Polyides rotundus* | *Polyides rotundus* | GWS040927 | KY572387 |  |  | 12-Jun-2016 | Norway | 60.5308 | 4.98519 |
| *Polyides rotundus* | *Polyides rotundus* | GWS038018 | KY572233 |  |  | 03-Jun-2016 | Norway | 60.2412 | 5.2021 |
| *Polysiphonia stricta* | *Polysiphonia* sp. 1stricta | GWS018086 | HM915184 | MF120890 |  | 19-Apr-2010 | United States, Maine | 43.565 | -70.199 |
| *Polysiphonia stricta* | *Polysiphonia* sp. 2stricta | GWS017899 | HM915116 | KU564468 |  | 14-Apr-2010 | United States, Massachusetts | 41.525 | -70.673 |
| *Polysiphonia stricta* | *Polysiphonia* sp. 2stricta | GWS040082 | KY572539 |  |  | 08-Jun-2016 | Norway | 60.6627 | 4.78749 |
| *Polysiphonia stricta* | *Polysiphonia* sp. 2stricta | GWS040033 | KY572734 |  |  | 07-Jun-2016 | Norway | 60.6627 | 4.78749 |
| *Polysiphonia stricta* | *Polysiphonia* sp. 2stricta | GWS039968 | KY572470 |  |  | 06-Jun-2016 | Norway | 60.4936 | 4.91898 |
| *Polysiphonia stricta* | *Polysiphonia* sp. 2stricta | GWS039936 | KY572534 |  |  | 06-Jun-2016 | Norway | 60.4977 | 4.91225 |
| *Polysiphonia stricta* | *Polysiphonia* sp. 2stricta | GWS039891 | KY572414 |  |  | 05-Jun-2016 | Norway | 60.4977 | 4.91225 |
| *Polysiphonia stricta* | *Polysiphonia* sp. 2stricta | GWS040942 | KY572142 |  |  | 13-Jun-2016 | Norway | 60.159 | 5.00405 |
| *Polysiphonia stricta* | *Polysiphonia* sp. 2stricta | GWS040907 | KY572179 |  |  | 12-Jun-2016 | Norway | 60.5308 | 4.98519 |
| *Polysiphonia stricta* | *Polysiphonia* sp. 3stricta | GWS017861 | HM915107 | MF120876 |  | 14-Apr-2010 | United States, Massachusetts | 41.525 | -70.673 |
| *Polysiphonia* sp. | *Polysiphonia* sp. 23GWS | GWS040896 | MF409428 |  |  | 12-Jun-2016 | Norway | 60.5308 | 4.98519 |
| *Polysiphonia* sp. | *Polysiphonia* sp. 23GWS | GWS040797 | MF409432 |  |  | 10-Jun-2016 | Norway | 60.1762 | 5.11132 |
| *Polysiphonia* sp. | *Polysiphonia* sp. 23GWS | GWS040703 | MF409424 |  |  | 09-Jun-2016 | Norway | 60.1847 | 5.14938 |
| *Polysiphonia* sp. | *Polysiphonia* sp. 23GWS | GWS040681 | MF409426 |  |  | 09-Jun-2016 | Norway | 60.1847 | 5.14938 |
| *Polysiphonia* sp. | *Polysiphonia* sp. 23GWS | GWS040627 | MF409423 |  |  | 09-Jun-2016 | Norway | 60.1847 | 5.14938 |
| *Polysiphonia* sp. | *Polysiphonia* sp. 23GWS | GWS040626 | MF409431 |  |  | 09-Jun-2016 | Norway | 60.1847 | 5.14938 |
| *Porphyra umbilicalis* | *Porphyra umbilicalis* | GWS039807 | MN184289 |  |  | 04-Jun-2016 | Norway | 60.4936 | 4.91898 |
| *Porphyra umbilicalis* | *Porphyra umbilicalis* | 2016_BIO309A_68 | MN184302 |  |  | 19-Apr-2016 | Norway | 60.114 | 5.067 |
| *Pterothamnion plumula* | *Pterothamnion plumula* | RMAR1686 | KJ961055 |  |  | 25-Mar-2011 | France | 48.726 | -4.02358 |
| *Pterothamnion plumula* | *Pterothamnion plumula* | GWS040830 | MN184498 | MN184564 |  | 11-Jun-2016 | Norway | 60.4425 | 5.06462 |
| *Pterothamnion plumula* | *Pterothamnion plumula* | GWS040826 | MN184327 |  |  | 11-Jun-2016 | Norway | 60.4425 | 5.06462 |
| *Pterothamnion plumula* | *Pterothamnion plumula* | GWS040684 | MN184244 |  |  | 09-Jun-2016 | Norway | 60.1847 | 5.14938 |
| *Pterothamnion plumula* | *Pterothamnion plumula* | 2016_BIO309A_82 | MN184381 |  |  | 20-Apr-2016 | Norway | 60.239 | 5.239 |
| *Ptilota gunneri* | *Ptilota gunneri* | GWS040962 | MH309849 |  |  | 13-Jun-2016 | Norway | 60.159 | 5.00405 |
| *Ptilota gunneri* | *Ptilota gunneri* | GWS040953 | MH310042 |  |  | 13-Jun-2016 | Norway | 60.159 | 5.00405 |
| *Ptilota gunneri* | *Ptilota gunneri* | GWS040803 | MH309891 |  |  | 10-Jun-2016 | Norway | 60.1762 | 5.11132 |
| *Ptilota gunneri* | *Ptilota gunneri* | GWS040781 | MH309229 |  |  | 10-Jun-2016 | Norway | 60.1762 | 5.11132 |
| *Ptilota gunneri* | *Ptilota gunneri* | GWS040724 | MH309243 |  |  | 10-Jun-2016 | Norway | 60.1847 | 5.14938 |
| *Ptilota gunneri* | *Ptilota gunneri* | GWS040640 | MH309107 |  |  | 09-Jun-2016 | Norway | 60.1847 | 5.14938 |
| *Ptilota gunneri* | *Ptilota gunneri* | GWS040019 | MH309900 |  |  | 07-Jun-2016 | Norway | 60.6627 | 4.78749 |
| *Ptilota gunneri* | *Ptilota gunneri* | GWS040018 | MH309289 |  |  | 07-Jun-2016 | Norway | 60.6627 | 4.78749 |
| *Ptilota gunneri* | *Ptilota gunneri* | GWS040017 | MH309687 |  |  | 07-Jun-2016 | Norway | 60.6627 | 4.78749 |
| *Ptilota gunneri* | *Ptilota gunneri* | GWS040016 | MH309789 |  |  | 07-Jun-2016 | Norway | 60.6627 | 4.78749 |
| *Ptilota gunneri* | *Ptilota gunneri* | GWS040015 | MH309477 |  |  | 07-Jun-2016 | Norway | 60.6627 | 4.78749 |
| *Ptilota gunneri* | *Ptilota gunneri* | GWS040014 | MH308838 |  |  | 07-Jun-2016 | Norway | 60.6627 | 4.78749 |
| *Ptilota gunneri* | *Ptilota gunneri* | GWS040013 | MH310040 |  |  | 07-Jun-2016 | Norway | 60.6627 | 4.78749 |
| *Ptilota gunneri* | *Ptilota gunneri* | GWS040012 | MH308821 |  |  | 07-Jun-2016 | Norway | 60.6627 | 4.78749 |
| *Ptilota gunneri* | *Ptilota gunneri* | GWS039966 | MH308947 |  |  | 06-Jun-2016 | Norway | 60.4936 | 4.91898 |
| *Ptilota gunneri* | *Ptilota gunneri* | GWS039964 | MH309700 |  |  | 06-Jun-2016 | Norway | 60.4936 | 4.91898 |
| *Ptilota gunneri* | *Ptilota gunneri* | GWS039956 | MH309184 |  |  | 06-Jun-2016 | Norway | 60.4936 | 4.91898 |
| *Ptilota gunneri* | *Ptilota gunneri* | GWS039955 | MH309340 |  |  | 06-Jun-2016 | Norway | 60.4936 | 4.91898 |
| *Ptilota gunneri* | *Ptilota gunneri* | GWS039954 | MH308850 |  |  | 06-Jun-2016 | Norway | 60.4936 | 4.91898 |
| *Ptilota gunneri* | *Ptilota gunneri* | GWS039944 | MH309146 |  |  | 06-Jun-2016 | Norway | 60.4936 | 4.91898 |
| *Ptilota gunneri* | *Ptilota gunneri* | GWS039943 | MH309502 |  |  | 06-Jun-2016 | Norway | 60.4936 | 4.91898 |
| *Ptilota gunneri* | *Ptilota gunneri* | GWS039942 | MH309606 |  |  | 06-Jun-2016 | Norway | 60.4936 | 4.91898 |
| *Ptilota gunneri* | *Ptilota gunneri* | GWS039941 | MH309501 |  |  | 06-Jun-2016 | Norway | 60.4936 | 4.91898 |
| *Ptilota gunneri* | *Ptilota gunneri* | GWS039940 | MH143541 |  |  | 06-Jun-2016 | Norway | 60.4936 | 4.91898 |
| *Ptilota gunneri* | *Ptilota gunneri* | GWS039938 | MH309309 |  |  | 06-Jun-2016 | Norway | 60.4977 | 4.91225 |
| *Ptilota gunneri* | *Ptilota gunneri* | GWS039935 | MH309093 |  |  | 06-Jun-2016 | Norway | 60.4977 | 4.91225 |
| *Ptilota gunneri* | *Ptilota gunneri* | GWS039934 | MH309830 |  |  | 06-Jun-2016 | Norway | 60.4977 | 4.91225 |
| *Ptilota gunneri* | *Ptilota gunneri* | GWS039929 | MH309550 |  |  | 06-Jun-2016 | Norway | 60.4977 | 4.91225 |
| *Ptilota gunneri* | *Ptilota gunneri* | GWS039928 | MH309278 |  |  | 06-Jun-2016 | Norway | 60.4977 | 4.91225 |
| *Ptilota gunneri* | *Ptilota gunneri* | GWS039921 | MH310065 |  |  | 06-Jun-2016 | Norway | 60.4977 | 4.91225 |
| *Ptilota gunneri* | *Ptilota gunneri* | GWS039920 | MH309063 |  |  | 06-Jun-2016 | Norway | 60.4977 | 4.91225 |
| *Ptilota gunneri* | *Ptilota gunneri* | GWS039911 | MH309572 |  |  | 06-Jun-2016 | Norway | 60.4977 | 4.91225 |
| *Ptilota gunneri* | *Ptilota gunneri* | GWS039910 | MH308956 |  |  | 06-Jun-2016 | Norway | 60.4977 | 4.91225 |
| *Ptilota gunneri* | *Ptilota gunneri* | GWS039909 | MH309619 |  |  | 06-Jun-2016 | Norway | 60.4977 | 4.91225 |
| *Ptilota gunneri* | *Ptilota gunneri* | GWS040948 | MH308829 |  |  | 13-Jun-2016 | Norway | 60.159 | 5.00405 |
| *Ptilota gunneri* | *Ptilota gunneri* | GWS040941 | MH308788 |  |  | 13-Jun-2016 | Norway | 60.159 | 5.00405 |
| *Ptilota gunneri* | *Ptilota gunneri* | GWS040620 | MH308966 |  |  | 09-Jun-2016 | Norway | 60.1847 | 5.14938 |
| *Ptilota gunneri* | *Ptilota gunneri* | GWS040079 | MH309251 |  |  | 08-Jun-2016 | Norway | 60.6627 | 4.78749 |
| *Ptilota gunneri* | *Ptilota gunneri* | 2016_BIO309A_07 | MH308993 |  |  | 14-Apr-2016 | Norway | 60.162 | 5.04 |
| *Pyropia leucosticta* | *Pyropia leucosticta* | GWS040747 | MN184413 |  |  | 10-Jun-2016 | Norway | 60.1847 | 5.14938 |
| *Pyropia leucosticta* | *Pyropia leucosticta* | GWS039888 | MN184454 |  |  | 05-Jun-2016 | Norway | 60.4977 | 4.91225 |
| *Pyropia leucosticta* | *Pyropia leucosticta* | GWS039886 | MN184236 |  |  | 05-Jun-2016 | Norway | 60.4977 | 4.91225 |
| *Pyropia leucosticta* | *Pyropia leucosticta* | GWS038095 | MN184487 |  |  | 04-Jun-2016 | Norway | 60.4936 | 4.91898 |
| *Rhodomela confervoides* | *Rhodomela confervoides* | GWS040992 | MN184468 |  |  | 13-Jun-2016 | Norway | 60.159 | 5.23564 |
| *Rhodomela confervoides* | *Rhodomela confervoides* | GWS040991 | MN184472 |  |  | 13-Jun-2016 | Norway | 60.159 | 5.23564 |
| *Rhodomela confervoides* | *Rhodomela confervoides* | GWS040981 | MN184274 |  |  | 13-Jun-2016 | Norway | 60.159 | 5.23564 |
| *Rhodomela confervoides* | *Rhodomela confervoides* | GWS040806 | MN184489 |  |  | 10-Jun-2016 | Norway | 60.1762 | 5.11132 |
| *Rhodomela confervoides* | *Rhodomela confervoides* | GWS040795 | MN184334 |  |  | 10-Jun-2016 | Norway | 60.1762 | 5.11132 |
| *Rhodomela confervoides* | *Rhodomela confervoides* | GWS040755 | MN184512 |  |  | 10-Jun-2016 | Norway | 60.1762 | 5.11132 |
| *Rhodomela confervoides* | *Rhodomela confervoides* | GWS040735 | MN184438 |  |  | 10-Jun-2016 | Norway | 60.1847 | 5.14938 |
| *Rhodomela confervoides* | *Rhodomela confervoides* | GWS040702 | MN184420 |  |  | 09-Jun-2016 | Norway | 60.1847 | 5.14938 |
| *Rhodomela confervoides* | *Rhodomela confervoides* | GWS040699 | MN184318 |  |  | 09-Jun-2016 | Norway | 60.1847 | 5.14938 |
| *Rhodomela confervoides* | *Rhodomela confervoides* | GWS040694 | MN184419 |  |  | 09-Jun-2016 | Norway | 60.1847 | 5.14938 |
| *Rhodomela confervoides* | *Rhodomela confervoides* | GWS040682 | MN184368 |  |  | 09-Jun-2016 | Norway | 60.1847 | 5.14938 |
| *Rhodomela confervoides* | *Rhodomela confervoides* | GWS040631 | MN184315 |  |  | 09-Jun-2016 | Norway | 60.1847 | 5.14938 |
| *Rhodomela confervoides* | *Rhodomela confervoides* | GWS040613 | MN184432 |  |  | 09-Jun-2016 | Norway | 60.1847 | 5.14938 |
| *Rhodomela confervoides* | *Rhodomela confervoides* | GWS040083 | MN184377 |  |  | 08-Jun-2016 | Norway | 60.6627 | 4.78749 |
| *Rhodomela confervoides* | *Rhodomela confervoides* | GWS040063 | MN184343 |  |  | 08-Jun-2016 | Norway | 60.6627 | 4.78749 |
| *Rhodomela confervoides* | *Rhodomela confervoides* | GWS040058 | MH143531 |  |  | 08-Jun-2016 | Norway | 60.6627 | 4.78749 |
| *Rhodomela confervoides* | *Rhodomela confervoides* | GWS040030 | MN184265 |  |  | 07-Jun-2016 | Norway | 60.6627 | 4.78749 |
| *Rhodomela confervoides* | *Rhodomela confervoides* | GWS040029 | MN184255 |  |  | 07-Jun-2016 | Norway | 60.6627 | 4.78749 |
| *Rhodomela confervoides* | *Rhodomela confervoides* | GWS040028 | MN184479 |  |  | 07-Jun-2016 | Norway | 60.6627 | 4.78749 |
| *Rhodomela confervoides* | *Rhodomela confervoides* | GWS039854 | MN184442 |  |  | 05-Jun-2016 | Norway | 60.2692 | 5.22123 |
| *Rhodomela confervoides* | *Rhodomela confervoides* | GWS038039 | MN184431 |  |  | 03-Jun-2016 | Norway | 60.2412 | 5.2021 |
| *Rhodomela confervoides* | *Rhodomela confervoides* | GWS038030 | MN184354 |  |  | 03-Jun-2016 | Norway | 60.2412 | 5.2021 |
| *Rhodomela confervoides* | *Rhodomela confervoides* | GWS040770 | MN184237 |  |  | 10-Jun-2016 | Norway | 60.1762 | 5.11132 |
| *Rhodomela confervoides* | *Rhodomela confervoides* | GWS040863 | MN184282 |  |  | 11-Jun-2016 | Norway | 60.4425 | 5.06462 |
| *Rhodomela confervoides* | *Rhodomela confervoides* | 2016_BIO309A_58 | MN184414 |  |  | 19-Apr-2016 | Norway | 60.114 | 5.067 |
| *Rhodomela lycopodioides* | *Rhodomela lycopodioides* | GWS040965 | KY572217 |  |  | 13-Jun-2016 | Norway | 60.159 | 5.23564 |
| *Rhodomela lycopodioides* | *Rhodomela lycopodioides* | GWS040957 | KY572790 |  |  | 13-Jun-2016 | Norway | 60.159 | 5.00405 |
| *Rhodomela lycopodioides* | *Rhodomela lycopodioides* | GWS040946 | KY572298 | MH277292 |  | 13-Jun-2016 | Norway | 60.159 | 5.00405 |
| *Rhodomela lycopodioides* | *Rhodomela lycopodioides* | GWS040939 | KY572704 |  |  | 13-Jun-2016 | Norway | 60.159 | 5.00405 |
| *Rhodomela lycopodioides* | *Rhodomela lycopodioides* | GWS040938 | KY572197 |  |  | 13-Jun-2016 | Norway | 60.159 | 5.00405 |
| *Rhodomela lycopodioides* | *Rhodomela lycopodioides* | GWS040708 |  | MN184542 |  | 09-Jun-2016 | Norway | 60.1847 | 5.14938 |
| *Rhodomela lycopodioides* | *Rhodomela lycopodioides* | GWS040087 |  | MN184548 |  | 08-Jun-2016 | Norway | 60.6627 | 4.78749 |
| *Rhodomela lycopodioides* | *Rhodomela lycopodioides* | GWS040006 | KY572176 |  |  | 07-Jun-2016 | Norway | 60.6627 | 4.78749 |
| *Rhodomela lycopodioides* | *Rhodomela lycopodioides* | GWS040004 | KY572622 |  |  | 07-Jun-2016 | Norway | 60.6627 | 4.78749 |
| *Rhodomela lycopodioides* | *Rhodomela lycopodioides* | GWS039967 | KY572810 |  |  | 06-Jun-2016 | Norway | 60.4936 | 4.91898 |
| *Rhodomela lycopodioides* | *Rhodomela lycopodioides* | GWS039957 |  | MN184555 |  | 06-Jun-2016 | Norway | 60.4936 | 4.91898 |
| *Rhodomela lycopodioides* | *Rhodomela lycopodioides* | GWS039939 | KY572307 |  |  | 06-Jun-2016 | Norway | 60.4936 | 4.91898 |
| *Rhodomela lycopodioides* | *Rhodomela lycopodioides* | GWS039932 | KY572229 |  |  | 06-Jun-2016 | Norway | 60.4977 | 4.91225 |
| *Rhodomela lycopodioides* | *Rhodomela lycopodioides* | GWS039931 | KY572795 |  |  | 06-Jun-2016 | Norway | 60.4977 | 4.91225 |
| *Rhodomela lycopodioides* | *Rhodomela lycopodioides* | GWS039930 |  | MN184547 |  | 06-Jun-2016 | Norway | 60.4977 | 4.91225 |
| *Rhodomela lycopodioides* | *Rhodomela lycopodioides* | GWS039922 |  | MN184554 |  | 06-Jun-2016 | Norway | 60.4977 | 4.91225 |
| *Rhodomela lycopodioides* | *Rhodomela lycopodioides* | GWS039907 | MN184521 |  |  | 06-Jun-2016 | Norway | 60.4977 | 4.91225 |
| *Rhodomela lycopodioides* | *Rhodomela lycopodioides* | GWS039821 |  | MN184560 |  | 04-Jun-2016 | Norway | 60.4936 | 4.91898 |
| *Rhodomela lycopodioides* | *Rhodomela lycopodioides* | 2016_BIO309A_09 | KY572528 |  |  | 14-Apr-2016 | Norway | 60.162 | 5.04 |
| *Rhodophyllis* sp. | *Rhodophyllis* sp. MAR1 | RMAR2054 | KJ961064 |  |  | 30-Mar-2011 | France | 48.6511 | -2.1175 |
| *Rhodophyllis divaricata* | *Rhodophyllis* sp. MAR2 | GWS040986 | MN184393 |  |  | 13-Jun-2016 | Norway | 60.159 | 5.23564 |
| *Rhodophyllis divaricata* | *Rhodophyllis* sp. MAR2 | GWS040985 | MN184391 |  |  | 13-Jun-2016 | Norway | 60.159 | 5.23564 |
| *Rhodophyllis divaricata* | *Rhodophyllis* sp. MAR2 | GWS040982 | MN184469 |  |  | 13-Jun-2016 | Norway | 60.159 | 5.23564 |
| *Rhodophyllis divaricata* | *Rhodophyllis* sp. MAR2 | GWS040970 | MN184352 |  |  | 13-Jun-2016 | Norway | 60.159 | 5.23564 |
| *Rhodophyllis divaricata* | *Rhodophyllis* sp. MAR2 | GWS040791 | MN184475 |  |  | 10-Jun-2016 | Norway | 60.1762 | 5.11132 |
| *Rhodophyllis divaricata* | *Rhodophyllis* sp. MAR2 | GWS040772 | MN184305 |  |  | 10-Jun-2016 | Norway | 60.1762 | 5.11132 |
| *Rhodophyllis* sp. | *Rhodophyllis* sp. MAR3 | RMAR3350 | KJ961070 |  |  | 08-Mar-2012 | France | 48.7306 | -4.00366 |
| *Rhodophyllis* sp. | *Rhodophyllis* sp. MAR4 | GWS040848 | MG462772 | MG462778 |  | 11-Jun-2016 | Norway | 60.4425 | 5.06462 |
| *Rhodophyllis* sp. | *Rhodophyllis* sp. MAR4 | GWS040847 | MN184440 |  |  | 11-Jun-2016 | Norway | 60.4425 | 5.06462 |
| *Rhodophyllis* sp. | *Rhodophyllis* sp. MAR4 | GWS040843 | MN184291 |  |  | 11-Jun-2016 | Norway | 60.4425 | 5.06462 |
| *Rhodophyllis* sp. | *Rhodophyllis* sp. MAR4 | GWS040842 | MN184380 |  |  | 11-Jun-2016 | Norway | 60.4425 | 5.06462 |
| *Rhodophyllis* sp. | *Rhodophyllis* sp. MAR4 | GWS040841 | MN184501 |  |  | 11-Jun-2016 | Norway | 60.4425 | 5.06462 |
| *Seirospora interrupta* | *Seirospora interrupta* | GWS040845 | MN184523 | MN184570 |  | 11-Jun-2016 | Norway | 60.4425 | 5.06462 |
| Rhodomelacean sp. | *Symphyocladia* sp. 1Nor | GWS040949 | MN184513 | MN184567 |  | 13-Jun-2016 | Norway | 60.159 | 5.00405 |
| Rhodomelacean sp. | *Symphyocladia* sp. 1Nor | GWS040889 | MN184484 |  |  | 12-Jun-2016 | Norway | 60.5308 | 4.98519 |
| Rhodomelacean sp. | *Symphyocladia* sp. 1Nor | GWS040888 | MN184503 |  |  | 12-Jun-2016 | Norway | 60.5308 | 4.98519 |
| Rhodomelacean sp. | *Symphyocladia* sp. 1Nor | GWS040738 | MN184345 |  |  | 10-Jun-2016 | Norway | 60.1847 | 5.14938 |
| *Titanoderma* *macrocarpum* | *Titanoderma macrocarpum* | GWS040950 | MN184311 |  |  | 13-Jun-2016 | Norway | 60.159 | 5.00405 |
| *Vertebrata byssoides* | *Vertebrata byssoides* | GWS040778 | MH143539 | MH277291 |  | 10-Jun-2016 | Norway | 60.1762 | 5.11132 |
| *Vertebrata lanosa* | *Vertebrata lanosa* | GWS039901 | MH143553 |  |  | 05-Jun-2016 | Norway | 60.4987 | 4.91362 |
| *Vertebrata lanosa* | *Vertebrata lanosa* | GWS039836 | MN184253 |  |  | 04-Jun-2016 | Norway | 60.4936 | 4.91898 |
| *Vertebrata lanosa* | *Vertebrata lanosa* | GWS038033 | MN184400 |  |  | 03-Jun-2016 | Norway | 60.2412 | 5.2021 |
| *Vertebrata lanosa* | *Vertebrata lanosa* | 2016_BIO309A_29 | MN184411 |  |  | 17-Apr-2016 | Norway | 60.27 | 5.221 |
| *Vertebrata fucoides* | *Vertebrata* sp. 1fucoides | GWS018146 | HM915205 | MF120880 |  | 19-Apr-2010 | United States, Maine | 43.565 | -70.199 |
| *Vertebrata fucoides* | *Vertebrata* sp. 2fucoides | GWS017939 | HM915135 | MF120836 |  | 15-Apr-2010 | United States, Connecticut | 41.32 | -72.075 |
| *Vertebrata fucoides* | *Vertebrata* sp. 2fucoides | GWS038082 | MF409417 |  |  | 03-Jun-2016 | Norway | 60.2692 | 5.22123 |
| *Vertebrata fucoides* | *Vertebrata* sp. 2fucoides | GWS038010 |  | MN184528 |  | 03-Jun-2016 | Norway | 60.2412 | 5.2021 |
| *Wildemania amplissima* | *Wildemania amplissima* | GWS040098 | MN184286 |  |  | 08-Jun-2016 | Norway | 60.6627 | 4.78749 |
| *Wildemania amplissima* | *Wildemania amplissima* | GWS040088 | MN184510 |  |  | 08-Jun-2016 | Norway | 60.6627 | 4.78749 |

Table S3: Morphological listings from Sector 8, Bergen area (Brattegard & Holte 2001), with updates. Note the second column lists taxonomic revisions to species names listed in column one.

| **Name** | **Currently valid name** | **Species located in sector 8 after Brattegard & Holte (1997)** | **Reference/comments** |
| --- | --- | --- | --- |
| **Chlorophyta** |  |  |  |
| *Acrochaete leptochaete* (Huber) Nielsen | *Ulvella leptochaete* (Huber) R.Nielsen, C.J.O'Kelly & B.Wysor |  |  |
| *Acrochaete repens* Pringsheim | *Ulvella repens* (Pringsheim) R.Nielsen, C.J.O'Kelly & B.Wysor |  |  |
| *Acrochaete viridis* (Reinke) Nielsen | *Ulvella viridis* (Reinke) R.Nielsen, C.J.O'Kelly & B.Wysor |  |  |
| *Acrochaete wittrockii* (Wille) Nielsen | *Ulvella wittrockii* (Wille) R.Nielsen, C.J.O'Kelly & B.Wysor |  |  |
| *Blastophysa rhizopus* Reinke |  |  |  |
| *Blidingia marginata* (J.Agardh) Dangeard |  |  |  |
| *Blidingia minima* (Nägeli ex. Kützing) Kylin |  |  |  |
| *Bolbocoleon piliferum* Pringsheim |  |  |  |
| *Bryopsis hypnoids* J.V.Lamouroux |  | Yes, revision of genus | Green seaweeds of Britain and Ireland (2007) |
| *Bryopsis plumosa* (Hudson) C.Agardh |  |  |  |
| *Capsosiphon fulvescens* (C.Agardh) Setchell & Garder |  |  |  |
| *Chaetomorpha area* (Dillwyn) Kützing |  |  |  |
| *Chaetomorpha linum* (Müller) Kützing |  |  |  |
| *Chaetomorpha mediterranea* (Kützing) Kützing | *Chaetomorpha ligustica* (Kützing) Kützing |  |  |
| *Chaetomorpha melagonium* (Weber & Mohr) Kützing |  |  |  |
| *Chlorochytrium cohnii* Wright |  |  |  |
| *Chlorochytrium dermatocolax* Reinke |  |  |  |
| *Chlorochytrium moorei* Gardner | *Halochlorococcum moorei* (N.L.Gardner) Kornmann & Sahling ex. Guiry |  |  |
| *Cladophora albida* (Nees) Kützing |  |  |  |
| *Cladophora dalmatica* Küzing |  |  |  |
| *Cladophora laetevirens* (Dillwyn) Kützing |  | Yes | Heggøy (2001) |
| *Cladophora pygmaea* Reinke | *Lychaete pygmea* (Reinke) M.J.Wynne | Yes | Heggøy (2001) |
| *Cladophora rupestris* (L.) Kützing |  |  |  |
| *Cladophora sericea* (Hudson) Kützing |  |  |  |
| *Cladophora vadorum* (Areschoug) Kützing |  |  |  |
| *Cladophora vagabunda* (L.) van den Hoek |  |  |  |
| *Coccomyxa astericola* Rosenvinge |  |  |  |
| *Codium fragile* subsp. *fragile* (Suringar) Hariot |  |  |  |
| *Codium vermilara* (Olivi) Delle Chiaje |  |  |  |
| *Derbesia marina* (Lyngbye) Solier |  |  |  |
| *Enteromorpha clathrata* (Roth) Greville | *Ulva clathrata* (Roth) C.Agardh |  |  |
| *Enteromorpha compressa* (L.) Nees | *Ulva compressa* Linnaeus |  |  |
| *Enteromorpha flexuosa* (Wulfen) J.Agardh | *Ulva flexuosa* Wulfen |  | Green seaweeds of Britain and Ireland (2007) |
| *Enteromorpha intestinalis (L.) Nees* | *Ulva intestinalis* Linnaeus |  |  |
| *Enteromorpha kylinii* Bliding | *Ulva kylinii* (Bliding) H.S.Hayden, Blomster, Maggs, P.C.Silva, M.J.Stanhope & J.R.Waaland |  |  |
| *Enteromorpha linza* (L.) J.Agardh | *Ulva linza* Linnaeus |  |  |
| *Enteromorpha prolifera* (Müller) J.Agardh | *Ulva prolifera* O.F.Müller |  |  |
| *Epicladia flustrae* Reinke |  |  |  |
| *Epicladia perforans* (Huber) Nielsen |  |  |  |
| *Epicladia testarum* (Kylin) Nielsen | *Ulvella testarum* (Kylin) R.Nielsen, C.J.O'Kelly & B.Wysor |  |  |
| *Gomontia polyrhiza* (Lagerheim) Bornet & Flahault |  |  |  |
| *Monostroma grevillei* (Thuret) Wittrock |  |  |  |
| *Monostroma obscurum* (Kützing) J.Agardh | *Ulvaria obscura* (Kützing) gayralex Bliding |  |  |
| *Monostroma oxyspermum* (Kützing) Doty | *Gayralia oxysperma* (Kützing) K.L.Vinogradova ex Scagel et al. |  |  |
| *Monostroma undulatum* Wittrock | *Protomonostroma undulatum* (Wittrock) K.L.Vinogradova |  |  |
| *Ochlochaete hystrix* Thwaites |  |  |  |
| *Ostreobium quekettii* Bornet & Flahault |  |  |  |
| *Percursaria percursa* (C.Agardh) Rosenvinge |  |  |  |
| *Phaeophila dendroides* (Crouan frat.) Batters |  |  |  |
| *Phaeophila tenuis* (Kylin) Nielsen | *Ruthnielsenia tenuis* (Kylin) C.J.O'Kelly, B.Wysor & W.K.Bellows |  |  |
| *Prasiola crispa* (Lightfoot) Kützing |  |  |  |
| *Prasiola furfuracea* (Mertens) Trevisan |  |  |  |
| *Prasiola stipitata* Suhr |  |  |  |
| *Pringsheimiella scutata* (Reinke) Marchewianka | *Ulvella scutata* (Reinke) R.Nielsen, C.J.O'Kelly & B.Wysor |  |  |
| *Pseudendoclonium fucicola* (Rosenvinge) Nielsen |  |  |  |
| *Pseudendoclonium submarinum* Wille |  |  |  |
| *Pseudopringsheimia confluens* (Rosenvinge) Wille |  |  |  |
| *Rhizoclonium riparium* (Roth.) Harv. |  |  |  |
| *Rhizoclonium tortuosum* (Dillwyn) Kützing |  |  |  |
| *Rosenvingiella polyrhiza* (Rosenvinge) Silva |  |  |  |
| *Spongomorpha aeruginosa* (L.) van den Hoek |  |  |  |
| *Spongomorpha arcta* (Dillwyn) Kützing | *Acrosiphonia arcta* (Dillwyn) Gain |  |  |
| *Tellamia contorta* Batters |  |  |  |
| *Ulothrix flacca* (Dillwyn) Thuret |  |  |  |
| *Ulothrix implexa* (Kützing) Kützing |  |  |  |
| *Ulva lactuca* L. | *Ulva fenestrata* Postels & Ruprecht |  | Wrongly identified *U. lactuca* |
| *Ulva scandinavica* Bliding | *Ulva rigida* C.Agardh |  |  |
| *Ulvella lens* Crouan frat. |  |  |  |
| *Uronema curvatum* Prinz | *Okellya curvata* (Prinz) Leliaert & Rueness |  |  |
| *Urospora penicilliformis* (Roth) Areschoug |  |  |  |
| **Phaeophyceae** |  |  |  |
| *Acrothrix gracilis* Kylin |  |  |  |
| *Alaria esculenta* (L.) Greville |  |  |  |
| *Ascophyllum nodosum* (L.) Le Jolis |  |  |  |
| *Asperococcus fistulosus* (Hudson) Hooker |  |  |  |
| *Asperococcus turneri* (J.E.Smith) W.J.Hooker | *Asperococcus bullosus* J.V.Lamouroux |  |  |
| *Chilionema foecundum* (Strömfelt) Fletcher | *Myrionema foecundum* (Strömfelt) Sauvageau |  |  |
| *Chilionema ocellatum* (Kützing) Kornmann |  |  |  |
| *Chorda filum* (L.) Stackhouse |  |  |  |
| *Chorda tomentosa* Lyngbye | *Halosiphon tomentosus* (Lyngbye) Jaasund |  |  |
| *Chordaria flagelliformis* (Müller) C. Agardh |  |  |  |
| *Cladosiphon zosterae* (J. Agardh) Kylin |  |  |  |
| *Cladostephus spongiosum* (Hudson) C. Agardh |  |  |  |
| *Colpomenia peregrina* Sauvageau |  |  |  |
| *Cutleria multifida* (Turner) Greville |  |  |  |
| *Desmarestia aculeata* (L.) Lamouroux |  |  |  |
| *Desmarestia ligulata* (Stackhouse) J.V.Lamouroux |  |  |  |
| *Desmarestia viridis* (Müller) Lamouroux |  |  |  |
| *Dictyosiphon chordaria* Areschoug |  |  |  |
| *Dictyosiphon foeniculaceus* (Hudson) Greville |  |  |  |
| *Dictyota dichotoma* (Hudson) Lamouroux |  |  |  |
| *Ectocarpus fasciculatus* Harvey |  |  |  |
| *Ectocarpus siliculosus* (Dillwyn) Lyngbye |  |  |  |
| *Elachista fucicola* (Velley) Areschoug |  |  |  |
| *Elachista scutulata* (Smith) Areschoug |  |  |  |
| *Elachista stellaris* Areschoug |  |  |  |
| *Endodictyon infestans* Gran |  |  |  |
| *Eudesme virescens* (Carmichael ex Berkeley) J.Agardh |  |  |  |
| *Feldmannia paradoxa* (Montagne) Hamel |  | Yes | Heggøy (2001) |
| *Feldmannia simplex* (Crouan frat.) Hamel |  |  |  |
| *Fucus ceranoides* L. |  |  |  |
| *Fucus cottonii* Wynne & Magne |  |  |  |
| *Fucus distichus* L. |  |  |  |
| *Fucus evanescens* C. Agardh | [*Fucus distichus* subsp. *evanescens* (C.Agardh) H.T.Powell](http://www.algaebase.org/search/species/detail/?species_id=D7998668f07415416) | Yes | (http://seaweeds.uib.no) |
| *Fucus serratus* L. |  |  |  |
| *Fucus spiralis* L. |  |  |  |
| *Fucus vesiculosus* L. |  |  |  |
| *Giraudya sphacelarioides* Derbès & Solier |  |  |  |
| *Gononema aecidioides* (Rosenvinge) Pedersen | *Laminariocolax aecidioides* (Rosenvinge) A.F.Peters |  |  |
| *Halidrys siliquosa* (L.) Lyngbye |  |  |  |
| *Halopteris scoparia* (L.) Sauvageau |  |  |  |
| *Halothrix lumbricalis* (Kützing) Reinke |  |  |  |
| *Haplospora globosa* Kjellman |  |  |  |
| *Hecatonema maculans* (Collins) Sauvageau | *Hecatonema terminale* (Kützing) Kylin |  |  |
| *Herponema desmarestiae* (Gran) Cardinal |  |  |  |
| *Himanthalia elongata* (L.) Gray |  |  |  |
| *Hincksia granulosa* (Smith) Silva |  |  |  |
| *Hincksia hincksiae* (Harvey) Silva |  |  |  |
| *Hincksia ovata* (Kjellman) Silva |  |  |  |
| *Hincksia sandriana* (Zanardini) Silva |  |  |  |
| *Isthmoplea sphaerophora* (Carmichael) Gobi |  |  |  |
| *Kuetzingiella holmesii* (Batters) Russell |  |  |  |
| *Laminaria digitata* (Hudson) Lamouroux |  |  |  |
| *Laminaria hyperborea* (Gunnerus) Foslie |  |  |  |
| *Laminaria saccharina* (L.) Lamouroux | *Saccharina latissima* (Linnaeus) C.E.Lane, C.Mayes, Druehl & G.W.Saunders |  |  |
| *Laminariocolax tomentosoides* (Farlow) Kylin |  |  |  |
| *Leathesia difformis* (L.) Areschoug | *Leathesia marina* (Lyngbye) Decaisne |  |  |
| *Leptonematella fasciculata* (Reinke) Silva |  |  |  |
| *Litosiphon laminariae* (Lyngbye) Harvey |  |  |  |
| *Mesogloia vermiculata* (Smith) Gray |  |  |  |
| *Microcoryne ocellata* Strömfelt |  |  |  |
| *Microspongium gelatinosum* Reinke |  |  | Uncertain status |
| *Microspongium globosum* Reinke |  |  |  |
| *Mikrosyphar polysiphoniae* Kuckuck |  |  |  |
| *Mikrosyphar porphyrae* Kuckuck |  |  |  |
| *Mikrosyphar zosterae* Kuckuck |  |  |  |
| *Myriactula chordae* (Areschoug) Levring |  |  |  |
| *Myriactula fucorum* (Rosenvinge) Kylin |  |  |  |
| *Myriactula haydenii* (Gatty) Levring |  |  |  |
| *Myriactula stellulata* (Harvey) Levring |  |  |  |
| *Myriocladia lovenii* J. Agardh |  |  |  |
| *Myrionema corunnae* Sauvageau |  |  |  |
| *Myrionema furcatum* Jaasund |  |  |  |
| *Myrionema magnusii* (Sauvageau) Loiseaux |  |  |  |
| *Myrionema seriatum* (Reinke) Kylin |  |  |  |
| *Myrionema strangulans* Greville |  |  |  |
| *Myriotrichia clavaeformis* Harvey |  |  |  |
| *Myriotrichia repens* Hauck |  |  |  |
| *Pelvetia canaliculata* (L.) Decaisne & Thuret |  |  |  |
| *Petalonia fascia* (Müller) Kuntze |  |  |  |
| *Petalonia zosterifolia* (Reinke) Kuntze | *Planosiphon zosterifolius* (Reinke) McDevit & G.W.Saunders |  |  |
| *Petroderma maculiforme* (Wollny) Kuckuck |  |  |  |
| *Phaeostroma pustulosum* Kuckuck |  |  |  |
| *Pilayella littoralis* (L.) Kjellman |  |  |  |
| *Pilayella varia* Kjellman |  |  |  |
| *Pogotrichum filiforme* Reinke |  |  |  |
| *Protectocarpus speciosus* (Börgesen) Kornmann |  |  |  |
| *Pseudolithoderma extensum* (Crouan frat.) Lund |  |  |  |
| *Punctaria latifolia* Greville |  |  |  |
| *Punctaria plantaginea* (Roth) Greville |  |  |  |
| *Punctaria tenuissima* (C. Agardh) Greville |  |  |  |
| *Ralfsia pusilla* (Strömfelt) Foslie |  |  |  |
| *Ralfsia verrucosa* (Areschoug) Areschoug |  |  |  |
| *Saccorhiza polyschides* (Lightfoot) Batters |  |  |  |
| *Sargassum muticum* (Yendo) Fensholt |  |  |  |
| *Scytosiphon lomentaria* (Lyngbye) Link |  |  |  |
| *Sorocarpus micromorus* (Bory) Silva | *Botrytella micromora* Bory |  |  |
| *Spermatochnus paradoxus* (Roth) Kützing |  |  |  |
| *Sphacelaria arctica* Harvey | *Battersia arctica* (Harvey) Draisma, Prud'homme & H.Kawai |  |  |
| *Sphacelaria caespitula* Lyngbye | *Sphaceloderma caespitulum* (Lyngbye) Draisma, Prud'homme & H.Kawai |  |  |
| *Sphacelaria cirrosa* (Roth) C. Agardh |  |  |  |
| *Sphacelaria nana* Nägeli | *Sphacelorbus nanus* (Nageli ex Kützing) Draisma, Prud'homme & H.Kawai |  |  |
| *Sphacelaria plumosa* Lyngbye | *Chaetopteris plumosa* (Lyngbye) Kützing |  |  |
| *Sphacelaria plumula* Zanardini |  |  |  |
| *Sphacelaria radicans* (Dillwyn) C. Agardh | *Protohalopteris radicans* (Dillwyn) Draisma, Prud'homme & H.Kawai |  |  |
| *Sphacelaria rigidula* Kützing |  |  |  |
| *Sphacelaria tribuloides* Meneghini |  | Yes | Heggøy (2001) |
| *Sphaerotrichia divaricata* (C. Agardh) Kylin |  |  |  |
| *Spongonema tomentosum* (Hudson) Kützing |  |  |  |
| *Stictyosiphon griffithsianus* (Le Jolis) Holmes & Batters |  |  |  |
| *Stictyosiphon soriferus* (Reinke) Rosenvinge |  |  |  |
| *Stictyosiphon tortilis* (Gobi) Reinke |  |  |  |
| *Stilophora rhizodes* (Turner) J. Agardh | *Stilophora tenella* (Esper) P.C.Silva |  |  |
| *Stragularia clavata* (Harvey) Hamel |  |  |  |
| *Striaria attenuata* (Greville) Greville |  |  |  |
| *Symphyocarpus strangulans* Rosenvinge |  |  |  |
| *Tilopteris mertensii* (Turner) Kützing |  |  |  |
| *Ulonema rhizophorum* Foslie |  |  |  |
| **Rhodophyta** |  |  |  |
| *Acrochaetium parvulum* (Kylin) Hoyt |  |  |  |
| *Acrochaetium secundatum* (Lyngbye) Nägeli |  | Yes | Heggøy (2001) |
| *Aglaothamnion bipinnatum* (Crouan frat.) Feldmann 6 G.Feldmann |  |  |  |
| *Aglaothamnion hookeri* (Dillwyn) Maggs & Hommersand | *Gaillona hookeri* (Dillwyn) Athanasiadis |  |  |
| *Aglaothamnion priceanum* Maggs, Guiry & Rueness |  |  |  |
| *Aglaothamnion pseudobyssoides* (P.Crouan & H.Crouan) Halos |  |  |  |
| *Aglaothamnion scopulorum* (C. Agardh) Feldmann-Mazoyer | *Gaillona scopulorum* (C.Agardh) Athanasiadis |  |  |
| *Aglaothamnion sepositum* (Gunnerus) Maggs & Hommersand | *Gaillona seposita* (Gunnerus) Athanasiadis |  |  |
| *Aglaothamnion tenuissimum* (Bonnem.) Feldm.-Maz. |  | Yes | Heggøy (2001) |
| *Ahnfeltia plicata* (Hudson) Fries |  |  |  |
| *Antithamnion cruciatum* (C. Agardh) Nägeli |  |  |  |
| *Antithamnion nipponicum* Yamada & Inagaki |  | Yes | Recently introduced, Rueness et al. (2007) |
| *Antithamnionella floccosa* (Müller) Whittick |  |  |  |
| *Apoglossum ruscifolium* (Turner) J. Agardh |  |  |  |
| *Audouinella alariae (Jonsson) Woelkerling* | *Acrochaetium alariae* (Jónsson) Bornet |  |  |
| *Audouinella floridula* (Dillwyn) Woelkerling | *Rhodothamniella floridula* (Dillwyn) Feldmann |  |  |
| *Audouinella membranacea* (Magnus) Papenfuss | *Rubrointrusa membranacea* (Magnus) S.L.Clayden & G.W.Saunders |  |  |
| *Audouinella purpurea* (Lightfoot) Woelkerling | *Rhodochorton purpureum* (Lightfoot) Rosenvinge |  |  |
| *Bangia atropurpurea* (Roth) C. Agardh | *Bangia fuscopurpurea* (Dillwyn) Lyngbye |  | Incorrectly identified in the past owing to potential synonymy, which is no longer supported |
| *Bonnemaisonia asparagoides* (Woodward) C. Agardh |  |  |  |
| *Bonnemaisonia hamifera* Hariot |  |  |  |
| *Brongniartella byssoides* (Goodenough & Woodward) Schmitz | *Vertebrata byssoides* (Goodenough & Woodward) Kuntze |  |  |
| *Callithamnion corymbosum* (Smith) Lyngbye |  |  |  |
| *Callithamnion tetragonum* (Withering) Gray |  |  |  |
| *Callocolax neglectus* Schmitz Batters |  |  |  |
| *Callophyllis cristata* (C. Agardh) Kützing | *Euthora cristata* (C.Agardh) J.Agardh |  |  |
| *Callophyllis laciniata* (Hudson) Kützing | *Metacallophyllis laciniata* (Hudson) A.Vergés & L.Le Gall |  |  |
| *Catenella caespitosa* (Withering) L.M.Irvine |  |  |  |
| *Ceramium cimbricum* H.E. Petersen in Rosenvinge | *Ceramium sungminbooi* J.R.Hughey & G.H.Boo | Yes | Heggøy (2001) |
| *Ceramium deslongchampsii* Chauvin |  |  |  |
| *Ceramium diaphanum* (Lightfoot) Roth |  |  |  |
| *Ceramium nodulosum* (Lightfoot) Ducluzeau | *Ceramium virgatum* Roth |  |  |
| *Ceramium pallidum* (Kützing) Maggs & Hommersand |  | Yes | Husa et al. (2014) |
| *Ceramium secundatum* Lyngbye |  |  |  |
| *Ceramium shuttleworthianum* (Kützing) Rabenhorst |  |  |  |
| *Ceramium strictum* Harvey | *Ceramium tenuicorne* (Kützing) Waern |  |  |
| *Ceratocolax hartzii* Rosenvinge | *Coccotylus hartzii* (Rosenvinge) Le Gall & G.W.Saunders |  |  |
| *Chondria dasyphylla* (Woodward) C. Agardh |  |  |  |
| *Chondrus crispus* Stackhouse |  |  |  |
| *Choreocolax polysiphoniae* Reinsch |  |  |  |
| *Chroodactylon ornatum* (C. Agardh) Basson |  |  |  |
| *Chylocladia verticillata* (Lightfoot) Bliding |  |  |  |
| *Coccotylus truncatus* (Pallas) Wynne & Heine |  |  |  |
| *Colaconema daviesii* (Dillwyn) Stegenga |  |  |  |
| *Colaconema nemalii* (de Not. ex L.Dufour) Stegenga |  | Yes | Heggøy (2001) |
| *Colaconema savianum* (Menegh.) R.Nielsen |  | Yes | Heggøy (2001) |
| *Compsothamnion gracillimum* De Toni |  |  |  |
| *Compsothamnion thuioides* (J.E.Smith) Nägeli |  |  |  |
| *Corallina officinalis* L. |  |  |  |
| *Cruoria pellita* (Lyngbye) Fries |  |  |  |
| *Cryptopleura ramosa* (Hudson) L.Newton |  |  |  |
| *Cystoclonium purpureum* (Hudson) Batters |  |  |  |
| *Dasya adela* Heggøy, Rueness & Sjøtun |  | Yes | Recently described, Sjøtun et al. (2016) |
| *Dasysiphonia japonica* (Yendo) H.-S.Kim |  |  |  |
| *Delesseria sanguinea* (Hudson) Lamouroux |  |  |  |
| *Dilsea carnosa* (Schmidel) Kuntze |  |  |  |
| *Dumontia contorta* (Gmelin) Ruprecht |  |  |  |
| *Erythrocladia irregularis* Rosenvinge |  |  |  |
| *Erythrotrichia carnea* (Dillwyn) J.Agardh |  |  |  |
| *Erythrotrichia reflexa* (Crouan frat.) Thuret ex De Toni |  |  |  |
| *Furcellaria lumbricalis* (Hudson) J.V.Lamouroux |  |  |  |
| *Gelidium pusillum* (Stackhouse) Le Jolis |  |  |  |
| *Gelidium spinosum* (S.G.Gmelin) P.C.Silva |  |  |  |
| *Gloiosiphonia capillaris* (Hudson) Carmichael |  |  |  |
| *Gracilaria gracilis* (Stackhouse) Steentoft, Irvine & Farnham |  |  |  |
| *Griffithsia corallinoides* (L.) Trevisan |  |  |  |
| *Haemescharia hennedyi* (Harvey) K.L.Vinogradova & Yacovleva |  |  |  |
| *Halarachnion ligulatum* (Woodward) Kützing |  |  |  |
| *Halosacciocolax kjellmanii* Lund | *Halosacciocolax lundii* Edelstein |  |  |
| *Halurus flosculosus* (Ellis) Maggs & Hommersand |  |  |  |
| [*Haraldiophyllum bonnemaisonii*(Kylin) Zinova](http://seaweeds.uib.no/?art=767) |  | Yes | [http://seaweeds.uib.no](http://seaweeds.uib.no/) |
| *Harveyella mirabilis* (Reinsch) F.Schmitz & Reinke |  |  |  |
| *Heterosiphonia plumosa* (Ellis) Batters |  |  |  |
| *Hildenbrandia rubra* (Sommerfelt) Meneghini |  |  |  |
| *Hypoglossum hypoglossoides* (Stackhouse) Collins & Hervey |  | Yes | [http://seaweeds.uib.no](http://seaweeds.uib.no/) |
| *Jania rubens* (L.) Lamouroux |  |  |  |
| *Leptophytum laeve* Adey |  |  | Status unsure |
| *Lithophyllum crouaniorum* Foslie |  |  |  |
| *Lithophyllum incrustans* Philippi |  |  |  |
| *Lithophyllum orbiculatum* (Foslie) Foslie |  |  |  |
| *Lithothamnion corallioides* (Crouan frat.) Crouan frat. |  |  |  |
| *Lithothamnion glaciale* Kjellman |  |  |  |
| *Lithothamnion sonderi* Hauck |  |  |  |
| *Lomentaria articulata* (Hudson) Lyngbye |  |  |  |
| *Lomentaria clavellosa* (Lightfoot ex Turner) Gaillon |  |  |  |
| *Lomentaria orcadensis* (Harvey) Collins |  |  |  |
| *Mastocarpus stellatus* (Stackhouse) Guiry |  |  |  |
| *Meiodiscus spetsbergensis* (Kjellman) Saunders & MacLachlan |  |  |  |
| *Melanothamnus harveyi* (Bailey) Díaz-Tapia & Maggs |  | Yes | Recently intoduced |
| *Melobesia membranacea* (Esper) Lamouroux |  |  |  |
| *Membranoptera alata* (Hudson) Stackhouse |  |  |  |
| *Monosporus pedicellatus* (Smith) Solier |  |  |  |
| *Nemalion elminthoides* (Velley) Batters |  |  | Species epihtet corrected |
| *Nitophyllum punctatum* (Stackhouse) Greville |  |  |  |
| *Odonthalia dentata* (L.) Lyngbye |  |  |  |
| *Osmundea pinnatifida* (Huds.) Stackh. |  | Yes |  |
| *Osmundea oederi* (Gunnerus) G.Furnari |  |  |  |
| *Palmaria palmata* (L.) F.Weber & D.Mohr |  |  |  |
| *Peyssonnelia dubyi* Crouan frat. |  |  |  |
| *Phycodrys rubens* (L.) Batters |  |  |  |
| *Phyllophora crispa* (Hudson) Dixon |  |  |  |
| *Phyllophora pseudoceranoïdes* (S.G.Gmelin) Newroth & A.R.A.Taylor ex P.S.Dixon & L.M.Irvine |  |  |  |
| *Phymatolithon calcareum* (Pallas) Adey & McKibbin |  |  |  |
| *Phymatolithon laevigatum* (Foslie) Foslie |  |  |  |
| *Phymatolithon lamii* (Lemoine) Chamberlain |  |  |  |
| *Phymatolithon lenormandii* (Areschoug) Adey |  |  |  |
| *Phymatolithon purpureum* (Crouan frat.) Woelkerling & Irvine |  |  |  |
| *Pleonosporium borreri* (Smith) Nägeli |  | Yes | Heggøy (2001) |
| *Plocamium cartilagineum* (L.) Dixon | *Plocamium lyngbyanum* Kützing | Yes | Wrongly identified in Scandinavia as *P. cartilagineum* |
| *Plumaria plumosa* (Hudson) Kuntze |  |  |  |
| *Pneophyllum caulerpae* (Foslie) Jones & Woelkerling | *Pneophyllum coronatum* (Rosanoff) Penrose |  |  |
| *Pneophyllum confervicola* (Kützing) Chamberlain |  |  |  |
| *Pneophyllum fragile* Kützing |  |  |  |
| *Pneophyllum limitatum* (Foslie) Chamberlain |  |  |  |
| *Polyides rotunda* (Hudson) Gaillon |  |  | Species epithet corrected |
| *Polysiphonia brodiei* (Dillwyn) Sprengel | *Leptosiphonia brodiei* (Dillwyn) A.M.Savoie & G.W.Saunders |  | Species epithet corrected |
| *Polysiphonia elongata* (Hudson) Sprengel | *Carradoriella elongata* (Hudson) Savoie & G.W.Saunders |  | Savoie (2017) |
| *Polysiphonia fibrillosa* (C.Agardh) Sprengel | *Leptosiphonia fibrillosa* (Dillwyn) Savoie & G.W.Saunders |  | Savoie (2017) |
| *Polysiphonia fucoides* (Hudson) Greville | *Vertebrata fucoides* (Hudson) Kuntze |  |  |
| *Polysiphonia hemisphaerica* Areschoug |  |  |  |
| *Polysiphonia lanosa* (L.) Tandy | *Vertebrata lanosa* (Linnaeus) T.A.Christensen |  |  |
| *Polysiphonia nigra* (Hudson) Batters | *Vertebrata nigra* (Hudson) Díaz-Tapia & Maggs |  |  |
| *Polysiphonia stricta* (Mertens ex Dillwyn) Greville |  |  |  |
| *Porphyra leucosticta* Thuret | *Pyropia leucosticta* (Thuret) Neefus & J.Brodie |  |  |
| *Porphyra linearis* Greville |  |  |  |
| *Porphyra miniata* (C. Agardh) C. Agardh | *Wildemania miniata* (C.Agardh) Foslie |  |  |
| *Wildemania amplissima* (Kjellman) Foslie |  | Yes | Bergen University museum, herbarium from ForBio course 2011 |
| *Porphyra purpurea* (Roth) C. Agardh |  |  |  |
| *Porphyra umbilicalis* Kützing |  |  |  |
| *Porphyropsis coccinea* (J.Agardh ex Areschoug) Rosenvinge |  |  |  |
| *Pterosiphonia parasitica* (Hudson) Falkenberg | *Symphyocladia parasitica* (Hudson) Savoie & G.W.Saunders |  | Savoie (2017) |
| *Pterothamnion plumula* (Ellis) Nägeli |  |  |  |
| *Ptilota gunneri* Silva, Maggs & Irvine |  |  |  |
| *Rhodomela confervoides* (Hudson) Silva |  |  |  |
| *Rhodomela lycopodioides* (L.) C. Agardh |  |  |  |
| *Rhodophyllis divaricata* (Stackhouse) Papenfuss |  |  |  |
| *Rhodophysema elegans* (P.Crouan & H.Crouan ex J.Agardh) P.S.Dixon |  |  |  |
| *Rhodophysema georgei* Batters |  |  |  |
| *Rhodothamniella floridula* (Dillwyn) Feldmann |  | Yes | [http://seaweeds.uib.no](http://seaweeds.uib.no/) |
| *Scagelia pusilla* (Ruprecht) Athanasiadis |  |  |  |
| *Scagelothamnion pusillum* (Ruprecht) Athanasiadis |  |  |  |
| *Schmitzia hiscockiana* Maggs & Guiry |  | Yes | Husa et al. (2014) |
| *Seirospora interrupta* (Smith) Schmitz |  |  |  |
| *Spermothamnion repens* (Dillwyn) Magnus |  |  |  |
| *Stylonema alsidii* (Zanardini) Drew |  |  |  |
| *Titanoderma corallinae* (Crouan frat.) Woelkerl., Chamberl. & Silva | Lithophyllum corallinae (P.Crouan & H.Crouan) Heydrich |  |  |
| *Titanoderma laminariae* (Crouan frat.) Chamberlain |  |  |  |
| *Titanoderma pustulatum* (Lamouroux) Nägeli |  |  |  |
| *Turnerella pennyi* (Harvey) Schmitz |  |  |  |
